# Supplementary material for: Mechanistic investigations of the asymmetric hydrosilylation of ketimines with trichlorosilane reveals a dual activation model and an organocatalyst with enhanced efficiency
Source: Royal Society of Chemistry journal article supplement (doi:10.1039/c6ob02537d), 2017-01-01
Supplement: c6ob02537d1.pdf [file c6ob02537d1.pdf]

**Mechanistic investigations of the asymmetric hydrosilylation of ketimines with trichlorosilane reveals a dual activation model and an organocatalyst with enhanced efficiency**

Xianfu Li, Andrew T. Reeder, Federica Torri, Harry Adams and Simon Jones\*

Department of Chemistry, University of Sheffield, Dainton Building, Brook Hill, Sheffield, UK. S3  
7HF

Email: [simon.jones@sheffield.ac.uk](mailto:simon.jones@sheffield.ac.uk)

|                                                             |    |
|-------------------------------------------------------------|----|
| Copies of $^1\text{H}$ and $^{13}\text{C}$ NMR data         | 2  |
| Copies of HPLC data                                         | 22 |
| Thermal ellipsoid plot of catalyst <b>17</b> (CCDC 1517809) | 34 |

CC1(C)N2C=CC=CC2=C1

**2**

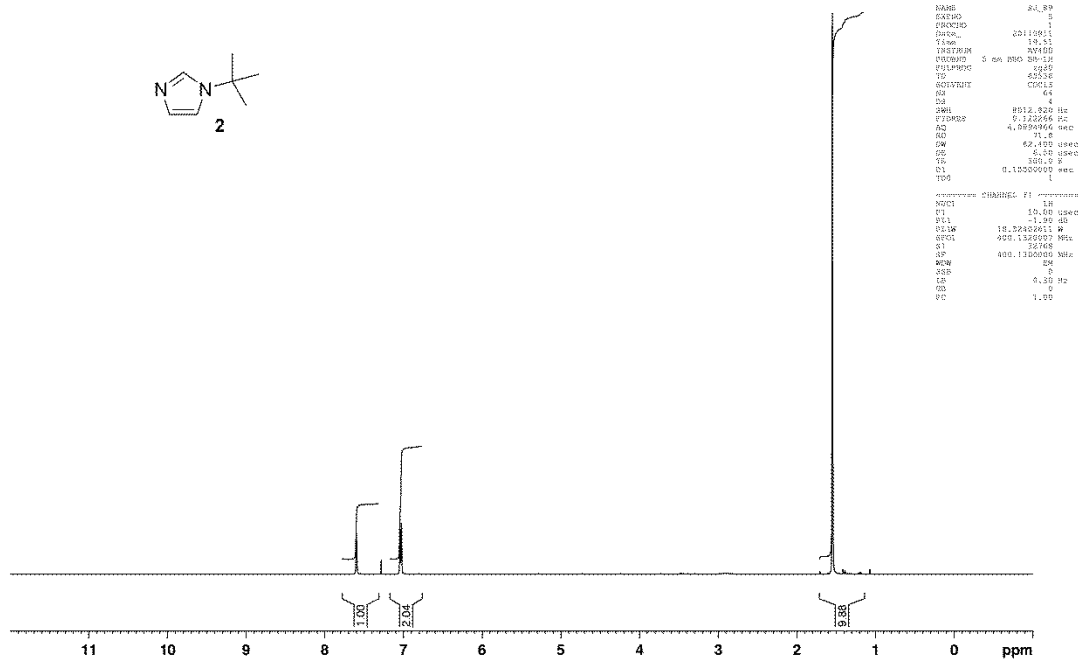CC(C)(C)n1ccncc1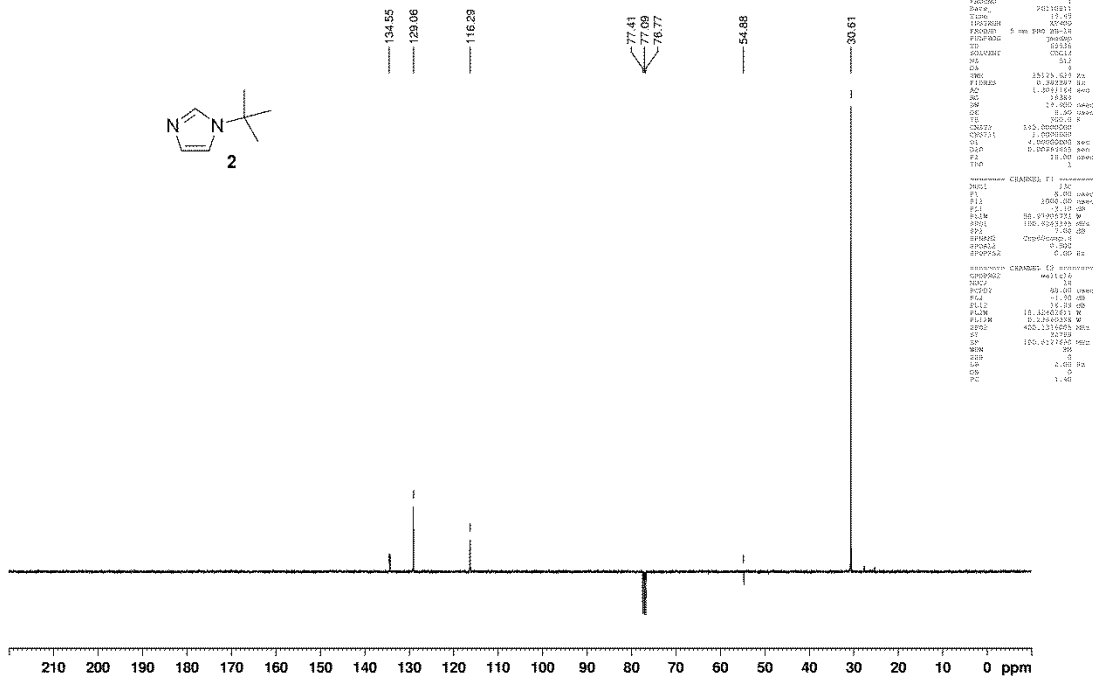

XL5-78  
PRO CDC13 {C:07|y2011} ch3sj 29

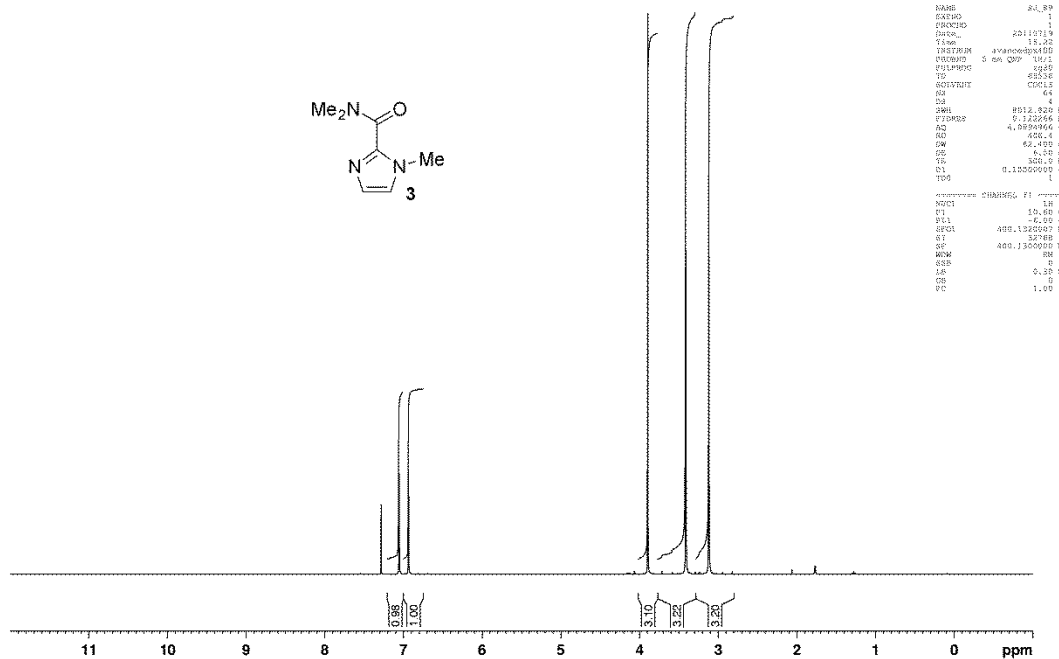

The University of Sheffield

NAME: XL5-78  
EXPNO: 1  
PROCNO: 1  
DATE\_: 20110719  
TIME: 15.02  
INSTRUM: avance400  
PROBHD: 5 mm QNP 1H/1  
PULPROG: zgpg30  
TD: 65536  
SOLVENT: CDCl<sub>3</sub>  
NS: 4  
DS: 4  
SWH: 8512.820 Hz  
F2: 101.625 MHz  
AQ: 4.0594966 sec  
RG: 655.4  
SQ: 62.470 sec  
DE: 6.500 sec  
TE: 300.2 K  
D1: 0.10000000 sec  
TD0: 1

===== CHANNEL f1 =====  
NUC1: 1H  
P1: 12.00 usec  
PL1: -6.00 dB  
SFO1: 400.1300000 MHz  
NUC2: 13C  
P2: 100.000000 usec  
PL2: 0.00 dB  
SFO2: 101.6250000 MHz

XL5-78  
A4JMOD250PPM CDC13 {C:07|y2011} ch3sj 30

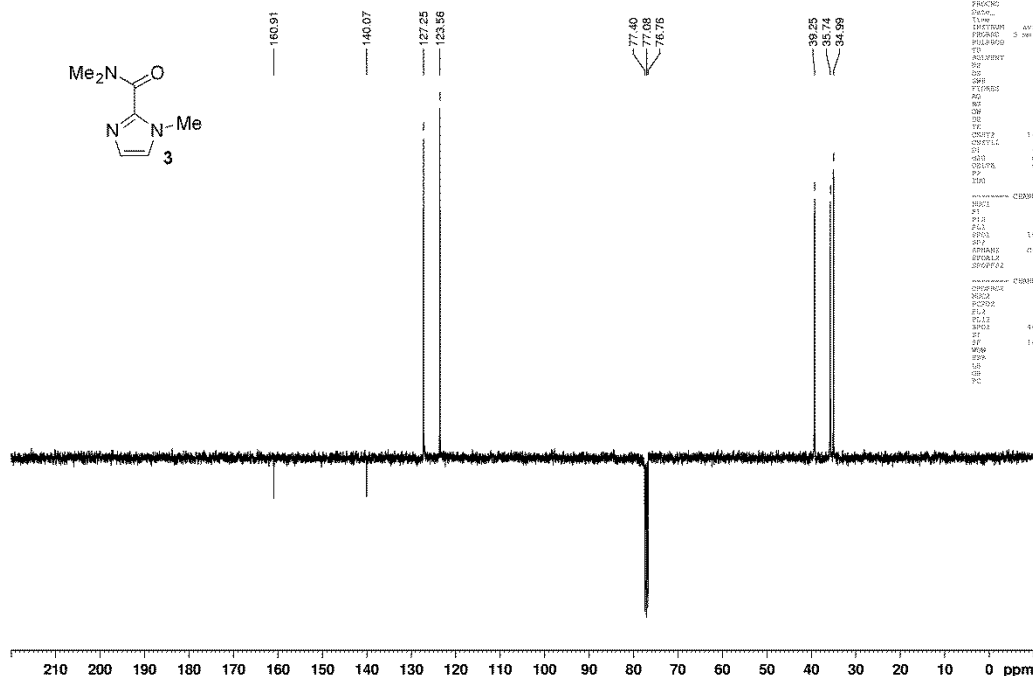

The University of Sheffield

NAME: XL5-78  
EXPNO: 2  
PROCNO: 1  
DATE\_: 20110719  
TIME: 15.02  
INSTRUM: avance400  
PROBHD: 5 mm QNP 1H/1  
PULPROG: zgpg30  
TD: 65536  
SOLVENT: CDCl<sub>3</sub>  
NS: 4  
DS: 4  
SWH: 25125.145 Hz  
F2: 101.625 MHz  
AQ: 1.0181144 sec  
RG: 12360.4  
SQ: 19.100 sec  
DE: 6.500 sec  
TE: 300.2 K  
D1: 145.0000000 sec  
D11: 0.00000000 sec  
D12: 0.00000000 sec  
DELTA: 0.00001713 sec  
PP: 20.00 usec  
TD0: 1

===== CHANNEL f1 =====  
NUC1: 13C  
P1: 10.00 usec  
PL1: 0.00 dB  
SFO1: 101.6250000 MHz  
NUC2: 1H  
P2: 12.00 usec  
PL2: 0.00 dB  
SFO2: 400.1300000 MHz

===== CHANNEL f2 =====  
NUC3: 13C  
P3: 10.00 usec  
PL3: 0.00 dB  
SFO3: 101.6250000 MHz

XL6-07  
PRO CDCl3 {C:\09se2011\} ch3sj 4

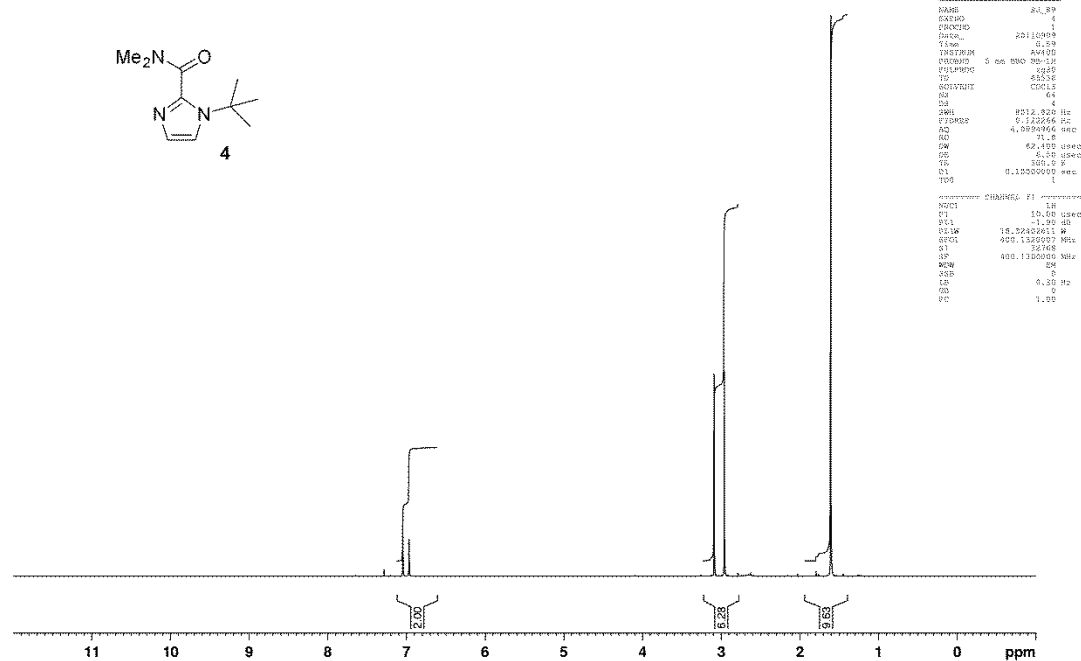

XL6-07  
JMOD250PPM CDCl3 {C:\09se2011\} ch3sj 4

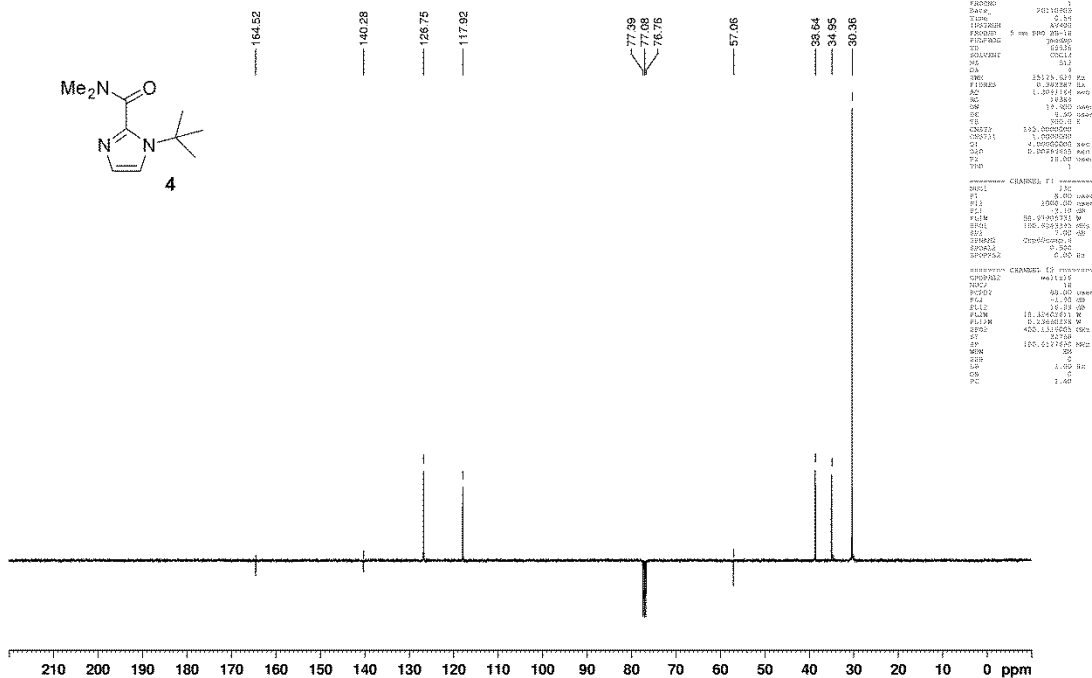

x1018 after column  
PRO CDCl<sub>3</sub> {C:\11no2008} ch3sj 31

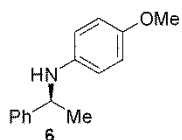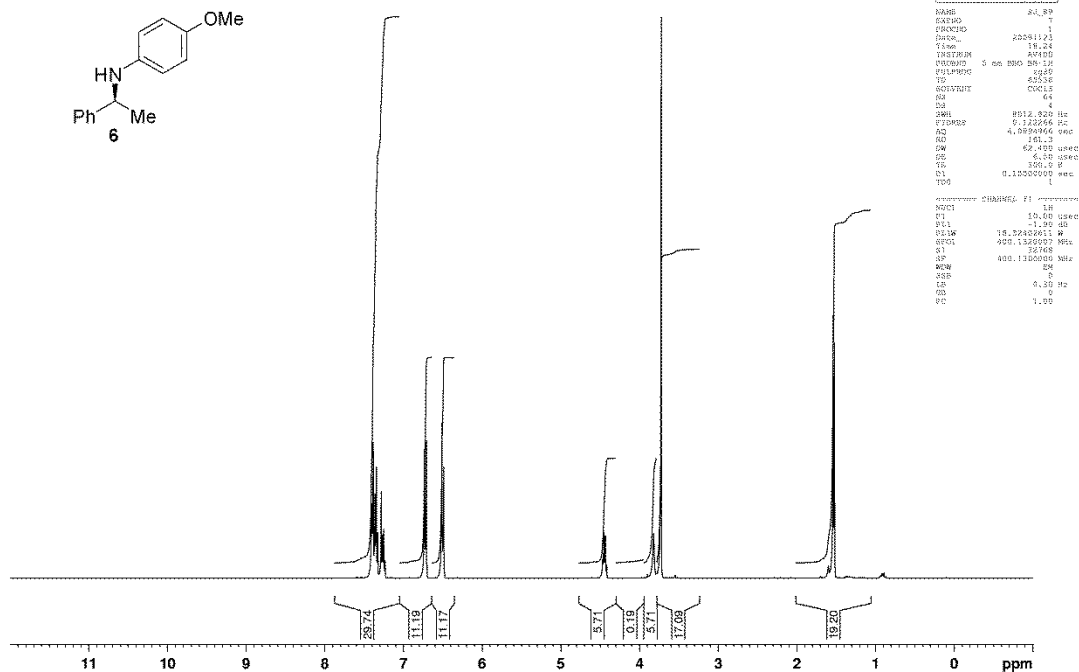

The University of Sheffield

NAME: A1\_89  
EXPER: 1  
PROCNO: 20081113  
Date\_: 18.12  
Time: 15.24  
INSTRUM: spect  
PULPROG: zgpg30  
PROBHD: 5 mm BBO BB-1H  
PULPROG: zgpg30  
TD: 65536  
SOLVENT: CDCl<sub>3</sub>  
NS: 64  
DS: 4  
SWH: 8512.820 Hz  
FIDRES: 0.116058 Hz  
AQ: 4.059966 sec  
RG: 655.3  
SN: 62.480 spec  
DS: 6.00 spec  
SS: 320.0 Hz  
SI: 0.1000000 sec  
RG: 1

===== CHANNEL f1 =====  
NUC1: 1H  
P1: 12.00 usec  
PL1: -1.90 dB  
PL12: 19.20dB 1H  
RF01: 400.1360007 MHz  
SI: 32768  
SF: 400.1360000 MHz  
WDW: EM  
SSB: 0  
LB: 0.30 Hz  
GB: 0  
PC: 1.00

XL5-92  
PRO CDCl<sub>3</sub> {C:\08au2011\} ch3sj 30

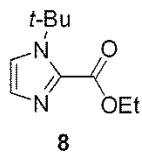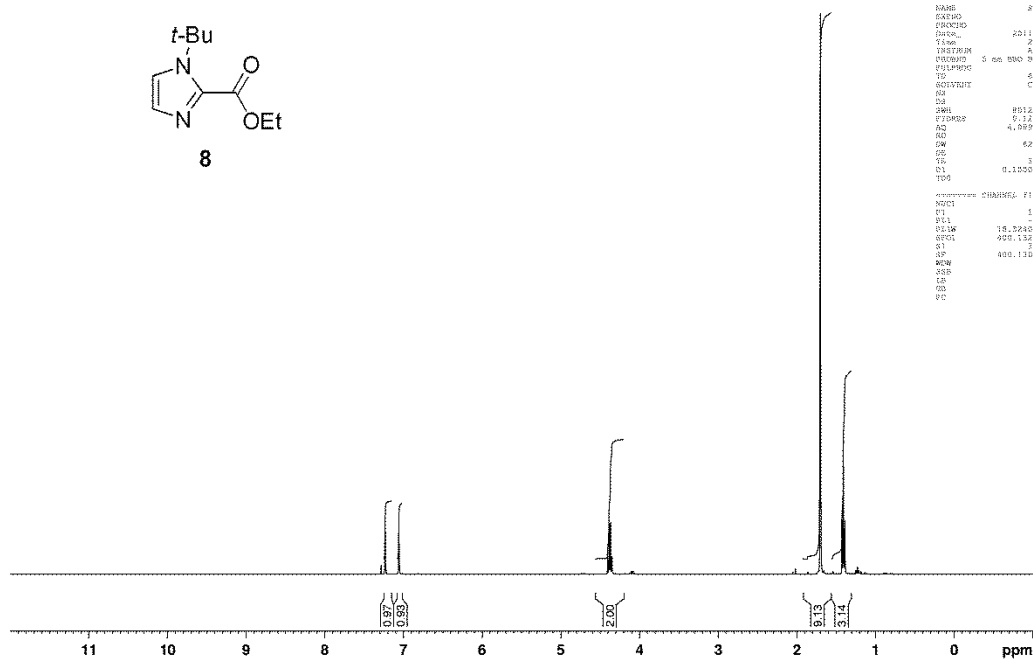

|                             |                 |
|-----------------------------|-----------------|
| The University of Sheffield |                 |
| NAME                        | XL5-92          |
| EXPNO                       | 1               |
| PROCNO                      | 1               |
| INSTR                       | 2D110914        |
| TIME                        | 20.00           |
| INSTRUM                     | 400MHz          |
| PROBHD                      | 5 mm BBO HD-1H  |
| PULPROG                     | zgpg30          |
| TD                          | 65536           |
| ROBIN                       | 2               |
| RG                          | 64              |
| SD                          | 4               |
| SWH                         | 1012.820 Hz     |
| F2                          | 514.000 MHz     |
| AQ                          | 4.0000000 sec   |
| RG                          | 64              |
| SW                          | 62.450 sec      |
| DS                          | 6.00 sec        |
| TE                          | 300.2 K         |
| D1                          | 0.1000000 sec   |
| TD1                         | 1               |
| ===== CHANNEL F1 =====      |                 |
| NUC1                        | 1H              |
| PT                          | 10.00 sec       |
| PUL                         | 1.00 sec        |
| PULP                        | 15.0000000 sec  |
| RF1                         | 400.1326000 MHz |
| SI                          | 32768           |
| RF                          | 400.1326000 MHz |
| NUC                         | 1H              |
| SD                          | 4               |
| SW                          | 62.450 sec      |
| DS                          | 6.00 sec        |
| TE                          | 300.2 K         |
| D1                          | 0.1000000 sec   |
| TD1                         | 1               |

XL5-92  
JMOD250PPM CDCl<sub>3</sub> {C:\08au2011\} ch3sj 30

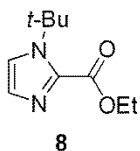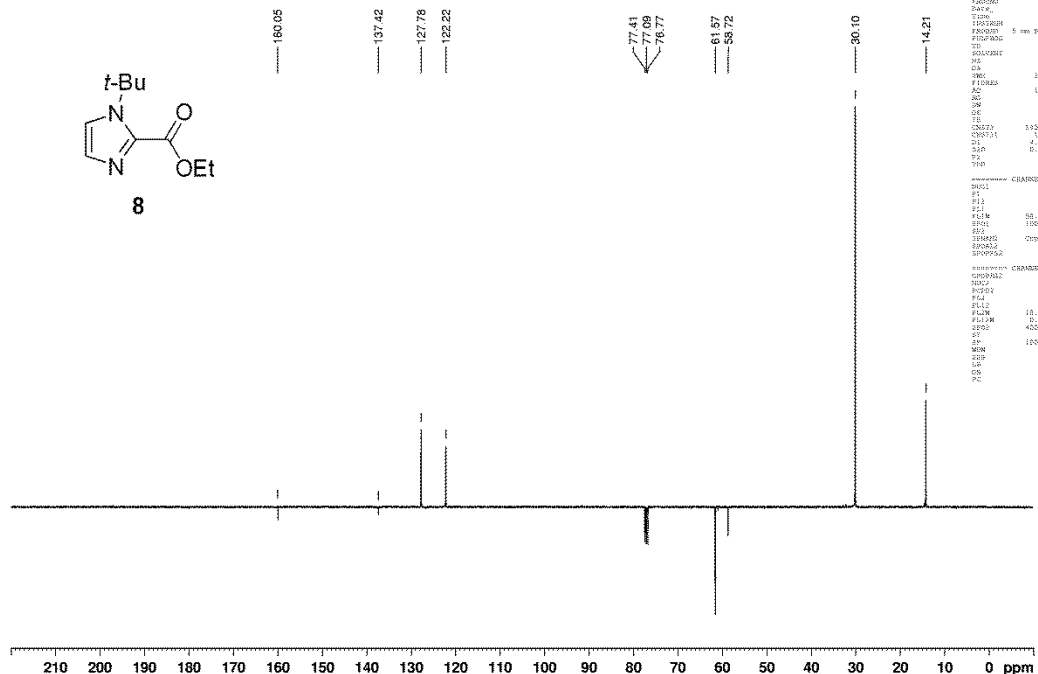

|                             |                 |
|-----------------------------|-----------------|
| The University of Sheffield |                 |
| NAME                        | XL5-92          |
| EXPNO                       | 1               |
| PROCNO                      | 1               |
| INSTR                       | 2D110914        |
| TIME                        | 20.00           |
| INSTRUM                     | 400MHz          |
| PROBHD                      | 5 mm BBO HD-1H  |
| PULPROG                     | zgpg30          |
| TD                          | 65536           |
| ROBIN                       | 2               |
| RG                          | 64              |
| SD                          | 4               |
| SWH                         | 1012.820 Hz     |
| F2                          | 514.000 MHz     |
| AQ                          | 4.0000000 sec   |
| RG                          | 64              |
| SW                          | 62.450 sec      |
| DS                          | 6.00 sec        |
| TE                          | 300.2 K         |
| D1                          | 0.1000000 sec   |
| TD1                         | 1               |
| ===== CHANNEL F1 =====      |                 |
| NUC1                        | 13C             |
| PT                          | 8.00 sec        |
| PUL                         | 1.00 sec        |
| PULP                        | 15.0000000 sec  |
| RF1                         | 100.6261200 MHz |
| SI                          | 32768           |
| RF                          | 100.6261200 MHz |
| NUC                         | 13C             |
| SD                          | 4               |
| SW                          | 62.450 sec      |
| DS                          | 6.00 sec        |
| TE                          | 300.2 K         |
| D1                          | 0.1000000 sec   |
| TD1                         | 1               |
| ===== CHANNEL F2 =====      |                 |
| NUC2                        | 1H              |
| PT2                         | 8.00 sec        |
| PUL2                        | 1.00 sec        |
| PULP2                       | 15.0000000 sec  |
| RF2                         | 400.1326000 MHz |
| SI2                         | 32768           |
| RF2                         | 400.1326000 MHz |
| NUC2                        | 1H              |
| SD2                         | 4               |
| SW2                         | 62.450 sec      |
| DS2                         | 6.00 sec        |
| TE2                         | 300.2 K         |
| D12                         | 0.1000000 sec   |
| TD12                        | 1               |

XL5-82  
PRO CDCl3 {C:\07\y2011\} ch3sj 16

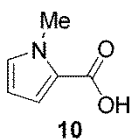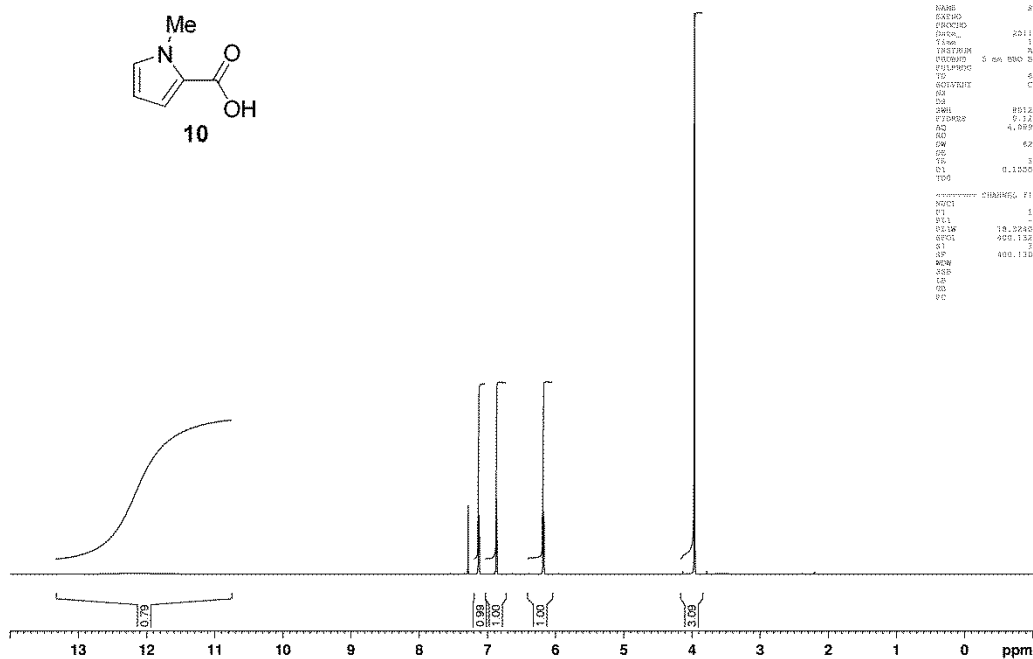

|                             |                |
|-----------------------------|----------------|
| The University of Sheffield |                |
| NAME                        | XL5-82         |
| EXPNO                       | 2              |
| PROCNO                      | 1              |
| DATE_                       | 20110722       |
| TIME                        | 14.00          |
| INSTRUM                     | QNP400         |
| PROBHD                      | 5 mm BBO 2D-1H |
| PULPROG                     | zgpg30         |
| TD                          | 65536          |
| SOLVENT                     | CDCl3          |
| NS                          | 64             |
| DS                          | 4              |
| SWH                         | 8012.820 Hz    |
| F2HRES                      | 0.140000 Hz    |
| AQ                          | 4.0590466 sec  |
| RG                          | 320            |
| SW                          | 62.400 e/sec   |
| GE                          | 6.000 e/sec    |
| TE                          | 300.2 K        |
| D1                          | 0.10000000 sec |
| TD0                         | 1              |
| ===== CHANNEL f1 =====      |                |
| NUC1                        | 1H             |
| NUC2                        | 13C            |
| NUC3                        | 13C            |
| NUC4                        | 13C            |
| NUC5                        | 13C            |
| NUC6                        | 13C            |
| NUC7                        | 13C            |
| NUC8                        | 13C            |
| NUC9                        | 13C            |
| NUC10                       | 13C            |
| NUC11                       | 13C            |
| NUC12                       | 13C            |
| NUC13                       | 13C            |
| NUC14                       | 13C            |
| NUC15                       | 13C            |
| NUC16                       | 13C            |
| NUC17                       | 13C            |
| NUC18                       | 13C            |
| NUC19                       | 13C            |
| NUC20                       | 13C            |
| NUC21                       | 13C            |
| NUC22                       | 13C            |
| NUC23                       | 13C            |
| NUC24                       | 13C            |
| NUC25                       | 13C            |
| NUC26                       | 13C            |
| NUC27                       | 13C            |
| NUC28                       | 13C            |
| NUC29                       | 13C            |
| NUC30                       | 13C            |
| NUC31                       | 13C            |
| NUC32                       | 13C            |
| NUC33                       | 13C            |
| NUC34                       | 13C            |
| NUC35                       | 13C            |
| NUC36                       | 13C            |
| NUC37                       | 13C            |
| NUC38                       | 13C            |
| NUC39                       | 13C            |
| NUC40                       | 13C            |
| NUC41                       | 13C            |
| NUC42                       | 13C            |
| NUC43                       | 13C            |
| NUC44                       | 13C            |
| NUC45                       | 13C            |
| NUC46                       | 13C            |
| NUC47                       | 13C            |
| NUC48                       | 13C            |
| NUC49                       | 13C            |
| NUC50                       | 13C            |
| NUC51                       | 13C            |
| NUC52                       | 13C            |
| NUC53                       | 13C            |
| NUC54                       | 13C            |
| NUC55                       | 13C            |
| NUC56                       | 13C            |
| NUC57                       | 13C            |
| NUC58                       | 13C            |
| NUC59                       | 13C            |
| NUC60                       | 13C            |
| NUC61                       | 13C            |
| NUC62                       | 13C            |
| NUC63                       | 13C            |
| NUC64                       | 13C            |
| NUC65                       | 13C            |
| NUC66                       | 13C            |
| NUC67                       | 13C            |
| NUC68                       | 13C            |
| NUC69                       | 13C            |
| NUC70                       | 13C            |
| NUC71                       | 13C            |
| NUC72                       | 13C            |
| NUC73                       | 13C            |
| NUC74                       | 13C            |
| NUC75                       | 13C            |
| NUC76                       | 13C            |
| NUC77                       | 13C            |
| NUC78                       | 13C            |
| NUC79                       | 13C            |
| NUC80                       | 13C            |
| NUC81                       | 13C            |
| NUC82                       | 13C            |
| NUC83                       | 13C            |
| NUC84                       | 13C            |
| NUC85                       | 13C            |
| NUC86                       | 13C            |
| NUC87                       | 13C            |
| NUC88                       | 13C            |
| NUC89                       | 13C            |
| NUC90                       | 13C            |
| NUC91                       | 13C            |
| NUC92                       | 13C            |
| NUC93                       | 13C            |
| NUC94                       | 13C            |
| NUC95                       | 13C            |
| NUC96                       | 13C            |
| NUC97                       | 13C            |
| NUC98                       | 13C            |
| NUC99                       | 13C            |
| NUC100                      | 13C            |

XL5-82  
JMOD250PPM CDCl3 {C:\08\au2011\} ch3sj 31

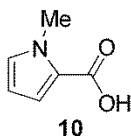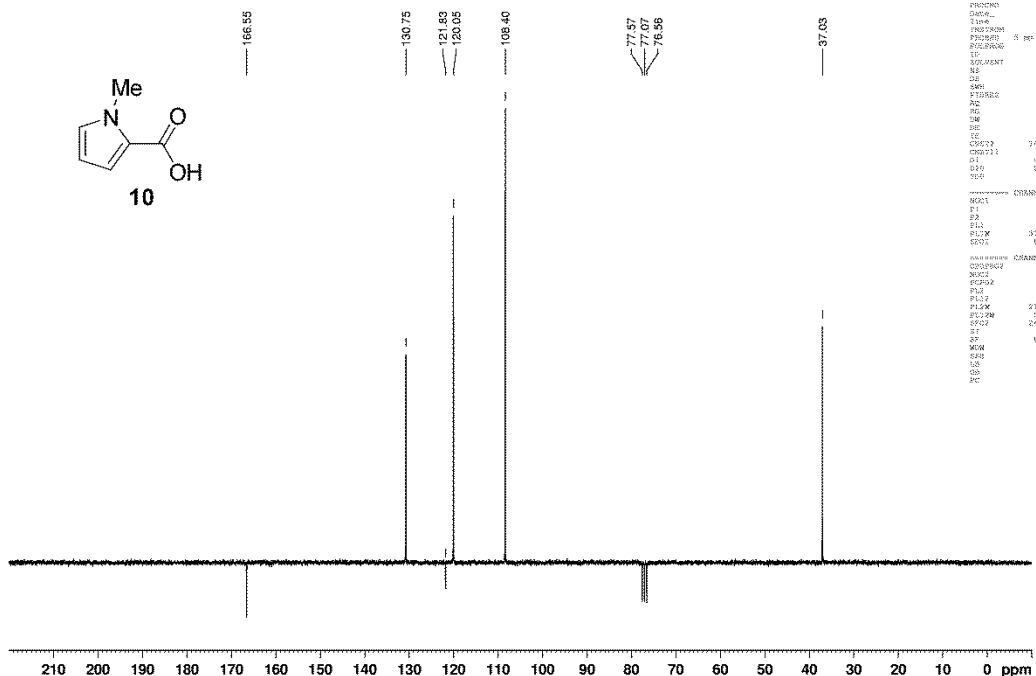

|                             |                |
|-----------------------------|----------------|
| The University of Sheffield |                |
| NAME                        | XL5-82         |
| EXPNO                       | 2              |
| PROCNO                      | 1              |
| DATE_                       | 20110802       |
| TIME                        | 10.12          |
| INSTRUM                     | QNP400         |
| PROBHD                      | 5 mm QNP 1H/13 |
| PULPROG                     | zgpg30         |
| TD                          | 65536          |
| SOLVENT                     | CDCl3          |
| NS                          | 512            |
| DS                          | 4              |
| SWH                         | 15723.275 Hz   |
| F2HRES                      | 0.4750000 Hz   |
| AQ                          | 1.8440726 sec  |
| RG                          | 320            |
| SW                          | 37.400 e/sec   |
| GE                          | 6.000 e/sec    |
| TE                          | 300.2 K        |
| D1                          | 0.10000000 sec |
| D11                         | 0.00000000 sec |
| D12                         | 0.00000000 sec |
| D13                         | 0.00000000 sec |
| D14                         | 0.00000000 sec |
| D15                         | 0.00000000 sec |
| D16                         | 0.00000000 sec |
| D17                         | 0.00000000 sec |
| D18                         | 0.00000000 sec |
| D19                         | 0.00000000 sec |
| D20                         | 0.00000000 sec |
| D21                         | 0.00000000 sec |
| D22                         | 0.00000000 sec |
| D23                         | 0.00000000 sec |
| D24                         | 0.00000000 sec |
| D25                         | 0.00000000 sec |
| D26                         | 0.00000000 sec |
| D27                         | 0.00000000 sec |
| D28                         | 0.00000000 sec |
| D29                         | 0.00000000 sec |
| D30                         | 0.00000000 sec |
| D31                         | 0.00000000 sec |
| D32                         | 0.00000000 sec |
| D33                         | 0.00000000 sec |
| D34                         | 0.00000000 sec |
| D35                         | 0.00000000 sec |
| D36                         | 0.00000000 sec |
| D37                         | 0.00000000 sec |
| D38                         | 0.00000000 sec |
| D39                         | 0.00000000 sec |
| D40                         | 0.00000000 sec |
| D41                         | 0.00000000 sec |
| D42                         | 0.00000000 sec |
| D43                         | 0.00000000 sec |
| D44                         | 0.00000000 sec |
| D45                         | 0.00000000 sec |
| D46                         | 0.00000000 sec |
| D47                         | 0.00000000 sec |
| D48                         | 0.00000000 sec |
| D49                         | 0.00000000 sec |
| D50                         | 0.00000000 sec |
| D51                         | 0.00000000 sec |
| D52                         | 0.00000000 sec |
| D53                         | 0.00000000 sec |
| D54                         | 0.00000000 sec |
| D55                         | 0.00000000 sec |
| D56                         | 0.00000000 sec |
| D57                         | 0.00000000 sec |
| D58                         | 0.00000000 sec |
| D59                         | 0.00000000 sec |
| D60                         | 0.00000000 sec |
| D61                         | 0.00000000 sec |
| D62                         | 0.00000000 sec |
| D63                         | 0.00000000 sec |
| D64                         | 0.00000000 sec |
| D65                         | 0.00000000 sec |
| D66                         | 0.00000000 sec |
| D67                         | 0.00000000 sec |
| D68                         | 0.00000000 sec |
| D69                         | 0.00000000 sec |
| D70                         | 0.00000000 sec |
| D71                         | 0.00000000 sec |
| D72                         | 0.00000000 sec |
| D73                         | 0.00000000 sec |
| D74                         | 0.00000000 sec |
| D75                         | 0.00000000 sec |
| D76                         | 0.00000000 sec |
| D77                         | 0.00000000 sec |
| D78                         | 0.00000000 sec |
| D79                         | 0.00000000 sec |
| D80                         | 0.00000000 sec |
| D81                         | 0.00000000 sec |
| D82                         | 0.00000000 sec |
| D83                         | 0.00000000 sec |
| D84                         | 0.00000000 sec |
| D85                         | 0.00000000 sec |
| D86                         | 0.00000000 sec |
| D87                         | 0.00000000 sec |
| D88                         | 0.00000000 sec |
| D89                         | 0.00000000 sec |
| D90                         | 0.00000000 sec |
| D91                         | 0.00000000 sec |
| D92                         | 0.00000000 sec |
| D93                         | 0.00000000 sec |
| D94                         | 0.00000000 sec |
| D95                         | 0.00000000 sec |
| D96                         | 0.00000000 sec |
| D97                         | 0.00000000 sec |
| D98                         | 0.00000000 sec |
| D99                         | 0.00000000 sec |
| D100                        | 0.00000000 sec |

XL5-94  
PRO MeOD (C:\08au2011) ch3s] 25

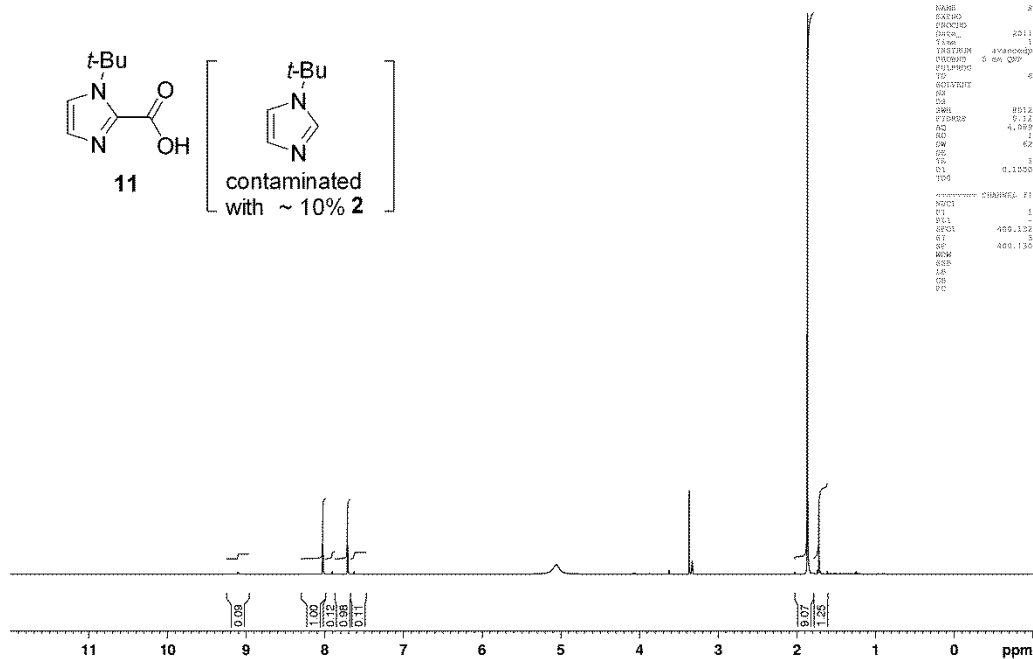

XL5-94  
A4JMOD250PPM MeOD (C:\08au2011) ch3s] 30

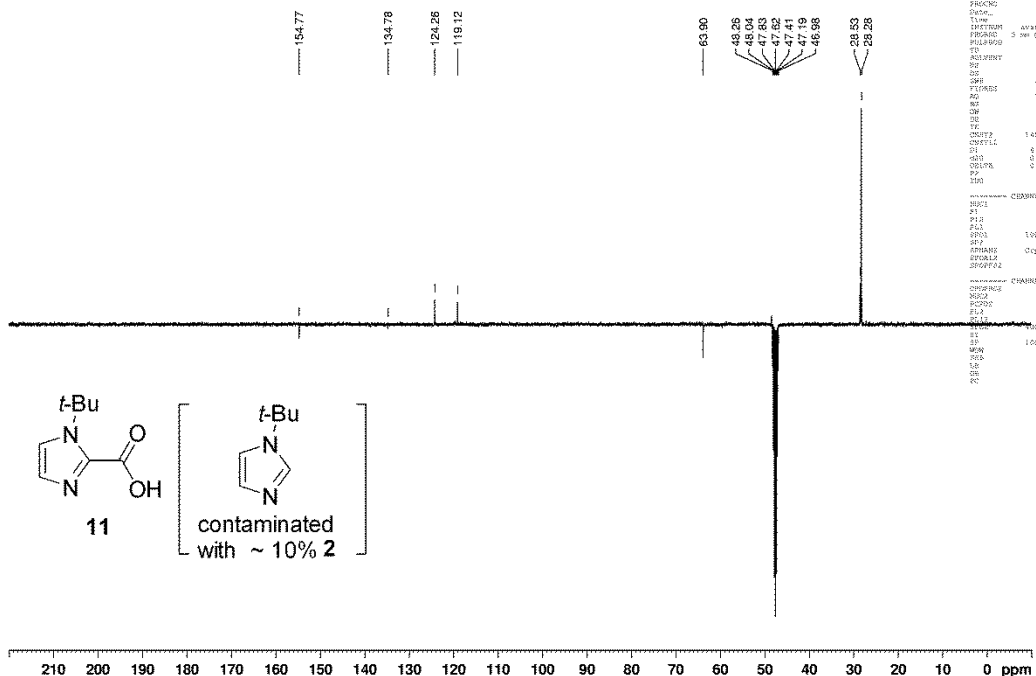



XianFu Li E28 Sample ref. WXL6-05 in DMSO at 100 deg.

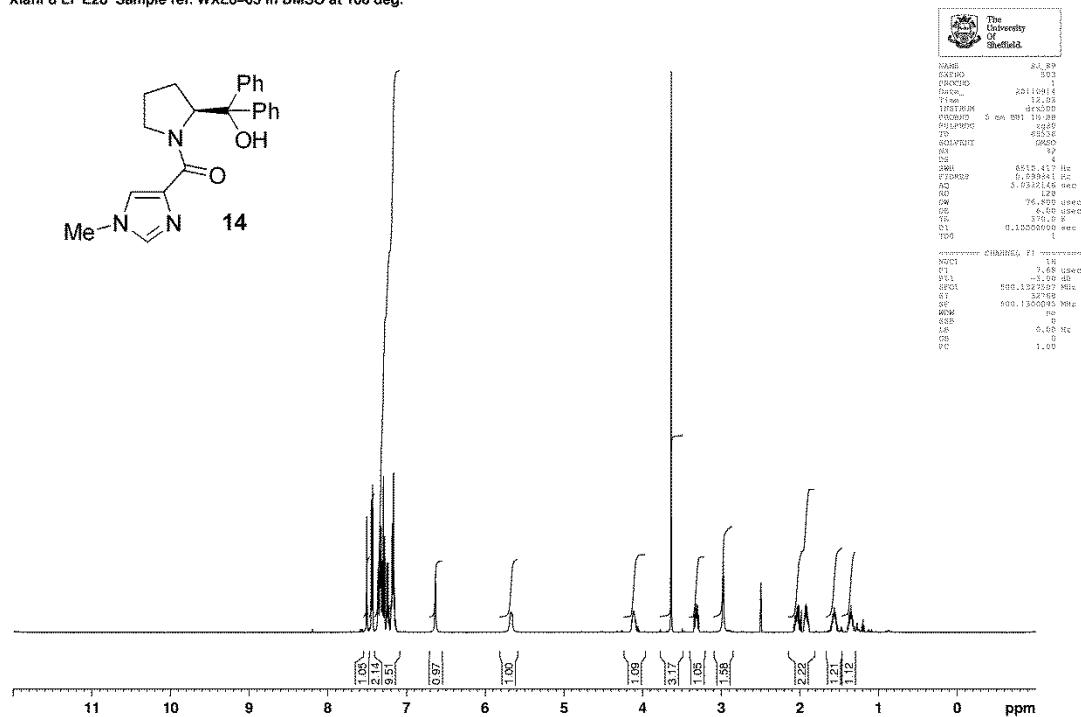

XianFu Li E28 Sample ref. WXL6-05 in DMSO at 100 deg.  
Backwards linear prediction parameters: NCOEF = 2048 TDOFF = 32

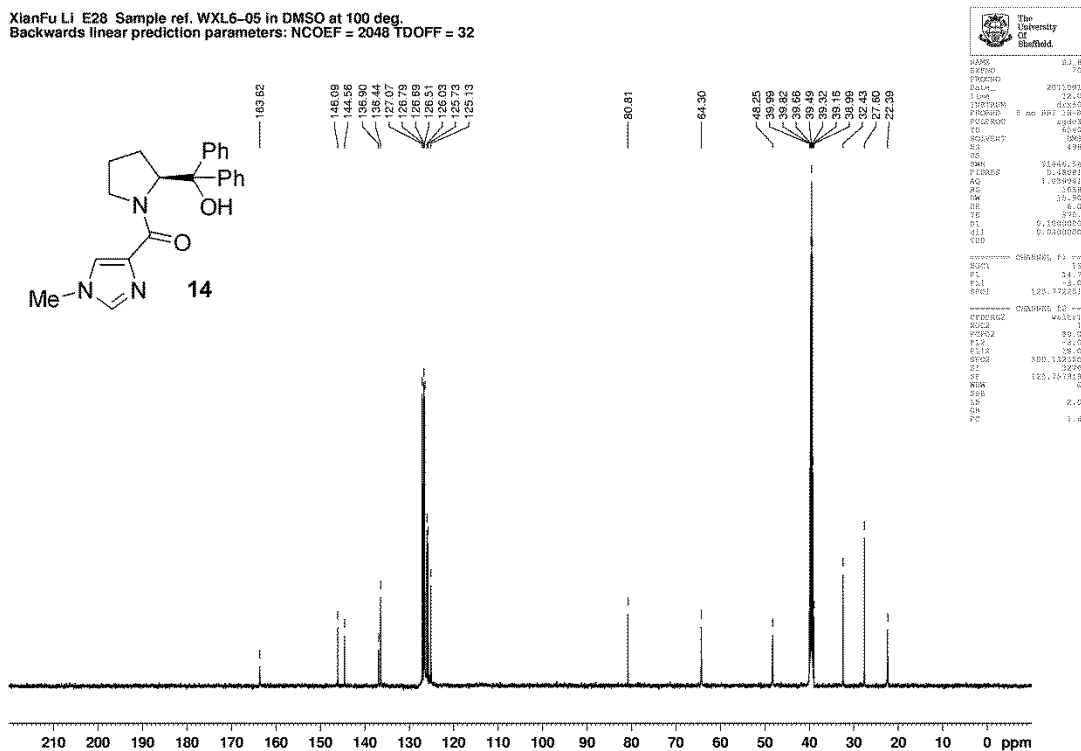

XL5-89  
PRO CDCl3 {C:\08au2011\} ch3sj 52

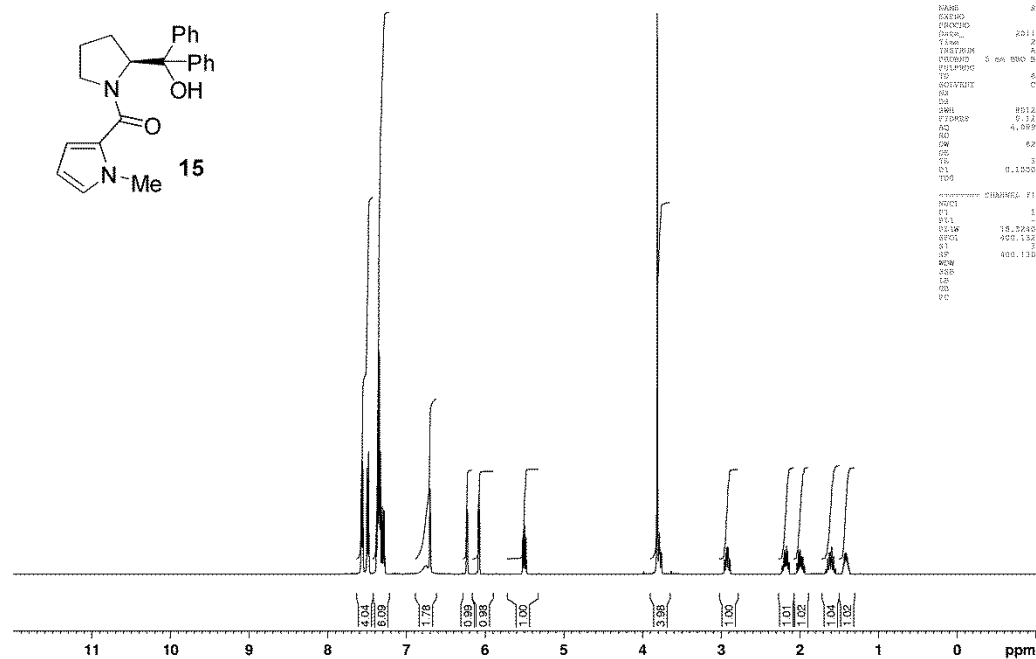

The University of Sheffield

NAME: AL 89  
EXPNO: 2  
PROCNO: 20110803  
Date\_: 22.10  
Time: 09:00  
INSTRUM: spect  
PROBHD: 5 mm BBO BB-1H  
PULPROG: zgpg30  
TD: 65536  
SOLVENT: CDCL3  
NS: 64  
DS: 4  
SWH: 8512.820 Hz  
FIDRES: 0.146000 Hz  
AQ: 4.0590966 sec  
RG: 60.0  
RW: 62.4700 sec  
GB: 6.00 sec  
PC: 100.0  
DT: 0.1000000 sec  
TE: 1

===== CHANNEL f1 =====  
NUC1: 1H  
P1: 12.00 usec  
PL1: -1.90 dB  
NUC2: 13C  
P2: 10.00 usec  
PL2: -1.90 dB  
NUC3: 13C  
P3: 10.00 usec  
PL3: -1.90 dB  
NUC4: 13C  
P4: 10.00 usec  
PL4: -1.90 dB  
NUC5: 13C  
P5: 10.00 usec  
PL5: -1.90 dB  
NUC6: 13C  
P6: 10.00 usec  
PL6: -1.90 dB  
NUC7: 13C  
P7: 10.00 usec  
PL7: -1.90 dB  
NUC8: 13C  
P8: 10.00 usec  
PL8: -1.90 dB  
NUC9: 13C  
P9: 10.00 usec  
PL9: -1.90 dB  
NUC10: 13C  
P10: 10.00 usec  
PL10: -1.90 dB  
NUC11: 13C  
P11: 10.00 usec  
PL11: -1.90 dB  
NUC12: 13C  
P12: 10.00 usec  
PL12: -1.90 dB  
NUC13: 13C  
P13: 10.00 usec  
PL13: -1.90 dB  
NUC14: 13C  
P14: 10.00 usec  
PL14: -1.90 dB  
NUC15: 13C  
P15: 10.00 usec  
PL15: -1.90 dB  
NUC16: 13C  
P16: 10.00 usec  
PL16: -1.90 dB  
NUC17: 13C  
P17: 10.00 usec  
PL17: -1.90 dB  
NUC18: 13C  
P18: 10.00 usec  
PL18: -1.90 dB  
NUC19: 13C  
P19: 10.00 usec  
PL19: -1.90 dB  
NUC20: 13C  
P20: 10.00 usec  
PL20: -1.90 dB  
NUC21: 13C  
P21: 10.00 usec  
PL21: -1.90 dB  
NUC22: 13C  
P22: 10.00 usec  
PL22: -1.90 dB  
NUC23: 13C  
P23: 10.00 usec  
PL23: -1.90 dB  
NUC24: 13C  
P24: 10.00 usec  
PL24: -1.90 dB  
NUC25: 13C  
P25: 10.00 usec  
PL25: -1.90 dB  
NUC26: 13C  
P26: 10.00 usec  
PL26: -1.90 dB  
NUC27: 13C  
P27: 10.00 usec  
PL27: -1.90 dB  
NUC28: 13C  
P28: 10.00 usec  
PL28: -1.90 dB  
NUC29: 13C  
P29: 10.00 usec  
PL29: -1.90 dB  
NUC30: 13C  
P30: 10.00 usec  
PL30: -1.90 dB  
NUC31: 13C  
P31: 10.00 usec  
PL31: -1.90 dB  
NUC32: 13C  
P32: 10.00 usec  
PL32: -1.90 dB  
NUC33: 13C  
P33: 10.00 usec  
PL33: -1.90 dB  
NUC34: 13C  
P34: 10.00 usec  
PL34: -1.90 dB  
NUC35: 13C  
P35: 10.00 usec  
PL35: -1.90 dB  
NUC36: 13C  
P36: 10.00 usec  
PL36: -1.90 dB  
NUC37: 13C  
P37: 10.00 usec  
PL37: -1.90 dB  
NUC38: 13C  
P38: 10.00 usec  
PL38: -1.90 dB  
NUC39: 13C  
P39: 10.00 usec  
PL39: -1.90 dB  
NUC40: 13C  
P40: 10.00 usec  
PL40: -1.90 dB  
NUC41: 13C  
P41: 10.00 usec  
PL41: -1.90 dB  
NUC42: 13C  
P42: 10.00 usec  
PL42: -1.90 dB  
NUC43: 13C  
P43: 10.00 usec  
PL43: -1.90 dB  
NUC44: 13C  
P44: 10.00 usec  
PL44: -1.90 dB  
NUC45: 13C  
P45: 10.00 usec  
PL45: -1.90 dB  
NUC46: 13C  
P46: 10.00 usec  
PL46: -1.90 dB  
NUC47: 13C  
P47: 10.00 usec  
PL47: -1.90 dB  
NUC48: 13C  
P48: 10.00 usec  
PL48: -1.90 dB  
NUC49: 13C  
P49: 10.00 usec  
PL49: -1.90 dB  
NUC50: 13C  
P50: 10.00 usec  
PL50: -1.90 dB  
NUC51: 13C  
P51: 10.00 usec  
PL51: -1.90 dB  
NUC52: 13C  
P52: 10.00 usec  
PL52: -1.90 dB  
NUC53: 13C  
P53: 10.00 usec  
PL53: -1.90 dB  
NUC54: 13C  
P54: 10.00 usec  
PL54: -1.90 dB  
NUC55: 13C  
P55: 10.00 usec  
PL55: -1.90 dB  
NUC56: 13C  
P56: 10.00 usec  
PL56: -1.90 dB  
NUC57: 13C  
P57: 10.00 usec  
PL57: -1.90 dB  
NUC58: 13C  
P58: 10.00 usec  
PL58: -1.90 dB  
NUC59: 13C  
P59: 10.00 usec  
PL59: -1.90 dB  
NUC60: 13C  
P60: 10.00 usec  
PL60: -1.90 dB  
NUC61: 13C  
P61: 10.00 usec  
PL61: -1.90 dB  
NUC62: 13C  
P62: 10.00 usec  
PL62: -1.90 dB  
NUC63: 13C  
P63: 10.00 usec  
PL63: -1.90 dB  
NUC64: 13C  
P64: 10.00 usec  
PL64: -1.90 dB  
NUC65: 13C  
P65: 10.00 usec  
PL65: -1.90 dB  
NUC66: 13C  
P66: 10.00 usec  
PL66: -1.90 dB  
NUC67: 13C  
P67: 10.00 usec  
PL67: -1.90 dB  
NUC68: 13C  
P68: 10.00 usec  
PL68: -1.90 dB  
NUC69: 13C  
P69: 10.00 usec  
PL69: -1.90 dB  
NUC70: 13C  
P70: 10.00 usec  
PL70: -1.90 dB  
NUC71: 13C  
P71: 10.00 usec  
PL71: -1.90 dB  
NUC72: 13C  
P72: 10.00 usec  
PL72: -1.90 dB  
NUC73: 13C  
P73: 10.00 usec  
PL73: -1.90 dB  
NUC74: 13C  
P74: 10.00 usec  
PL74: -1.90 dB  
NUC75: 13C  
P75: 10.00 usec  
PL75: -1.90 dB  
NUC76: 13C  
P76: 10.00 usec  
PL76: -1.90 dB  
NUC77: 13C  
P77: 10.00 usec  
PL77: -1.90 dB  
NUC78: 13C  
P78: 10.00 usec  
PL78: -1.90 dB  
NUC79: 13C  
P79: 10.00 usec  
PL79: -1.90 dB  
NUC80: 13C  
P80: 10.00 usec  
PL80: -1.90 dB  
NUC81: 13C  
P81: 10.00 usec  
PL81: -1.90 dB  
NUC82: 13C  
P82: 10.00 usec  
PL82: -1.90 dB  
NUC83: 13C  
P83: 10.00 usec  
PL83: -1.90 dB  
NUC84: 13C  
P84: 10.00 usec  
PL84: -1.90 dB  
NUC85: 13C  
P85: 10.00 usec  
PL85: -1.90 dB  
NUC86: 13C  
P86: 10.00 usec  
PL86: -1.90 dB  
NUC87: 13C  
P87: 10.00 usec  
PL87: -1.90 dB  
NUC88: 13C  
P88: 10.00 usec  
PL88: -1.90 dB  
NUC89: 13C  
P89: 10.00 usec  
PL89: -1.90 dB  
NUC90: 13C  
P90: 10.00 usec  
PL90: -1.90 dB  
NUC91: 13C  
P91: 10.00 usec  
PL91: -1.90 dB  
NUC92: 13C  
P92: 10.00 usec  
PL92: -1.90 dB  
NUC93: 13C  
P93: 10.00 usec  
PL93: -1.90 dB  
NUC94: 13C  
P94: 10.00 usec  
PL94: -1.90 dB  
NUC95: 13C  
P95: 10.00 usec  
PL95: -1.90 dB  
NUC96: 13C  
P96: 10.00 usec  
PL96: -1.90 dB  
NUC97: 13C  
P97: 10.00 usec  
PL97: -1.90 dB  
NUC98: 13C  
P98: 10.00 usec  
PL98: -1.90 dB  
NUC99: 13C  
P99: 10.00 usec  
PL99: -1.90 dB  
NUC100: 13C  
P100: 10.00 usec  
PL100: -1.90 dB

XL5-89  
JMOD250PPM CDCl3 {C:\08au2011\} ch3sj 52

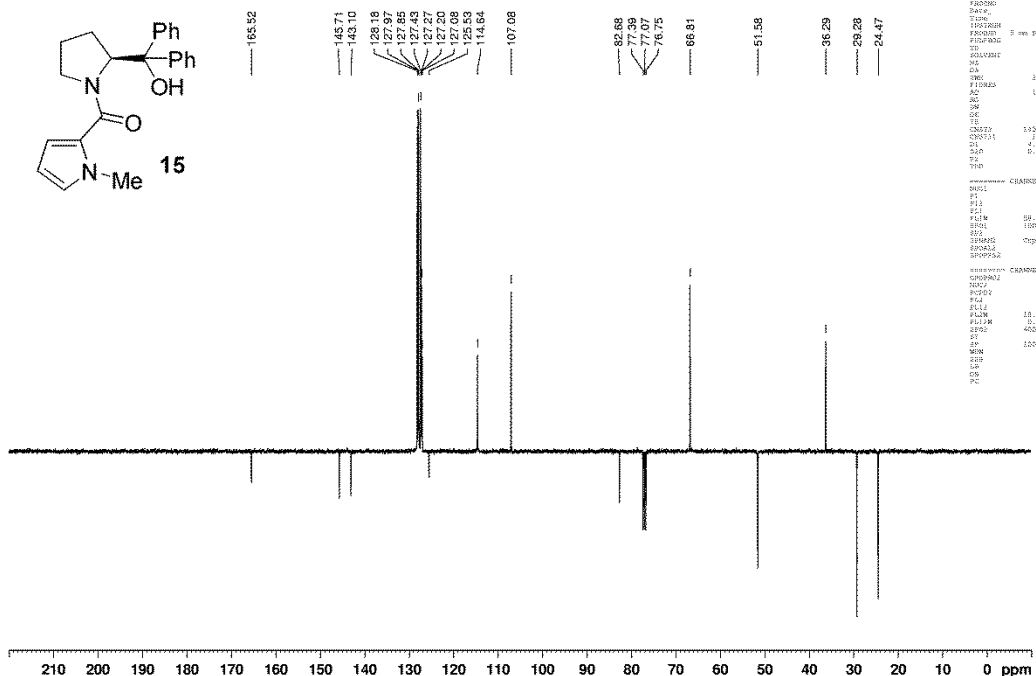

The University of Sheffield

NAME: AL 89  
EXPNO: 1  
PROCNO: 20110803  
Date\_: 22.10  
Time: 09:00  
INSTRUM: spect  
PROBHD: 5 mm BBO BB-1H  
PULPROG: zgpg30  
TD: 65536  
SOLVENT: CDCL3  
NS: 64  
DS: 4  
SWH: 15133.639 Hz  
FIDRES: 0.146000 Hz  
AQ: 4.0590966 sec  
RG: 60.0  
RW: 62.4700 sec  
GB: 6.00 sec  
PC: 100.0  
DT: 0.1000000 sec  
TE: 1

===== CHANNEL f1 =====  
NUC1: 13C  
P1: 12.00 usec  
PL1: -1.90 dB  
NUC2: 13C  
P2: 10.00 usec  
PL2: -1.90 dB  
NUC3: 13C  
P3: 10.00 usec  
PL3: -1.90 dB  
NUC4: 13C  
P4: 10.00 usec  
PL4: -1.90 dB  
NUC5: 13C  
P5: 10.00 usec  
PL5: -1.90 dB  
NUC6: 13C  
P6: 10.00 usec  
PL6: -1.90 dB  
NUC7: 13C  
P7: 10.00 usec  
PL7: -1.90 dB  
NUC8: 13C  
P8: 10.00 usec  
PL8: -1.90 dB  
NUC9: 13C  
P9: 10.00 usec  
PL9: -1.90 dB  
NUC10: 13C  
P10: 10.00 usec  
PL10: -1.90 dB  
NUC11: 13C  
P11: 10.00 usec  
PL11: -1.90 dB  
NUC12: 13C  
P12: 10.00 usec  
PL12: -1.90 dB  
NUC13: 13C  
P13: 10.00 usec  
PL13: -1.90 dB  
NUC14: 13C  
P14: 10.00 usec  
PL14: -1.90 dB  
NUC15: 13C  
P15: 10.00 usec  
PL15: -1.90 dB  
NUC16: 13C  
P16: 10.00 usec  
PL16: -1.90 dB  
NUC17: 13C  
P17: 10.00 usec  
PL17: -1.90 dB  
NUC18: 13C  
P18: 10.00 usec  
PL18: -1.90 dB  
NUC19: 13C  
P19: 10.00 usec  
PL19: -1.90 dB  
NUC20: 13C  
P20: 10.00 usec  
PL20: -1.90 dB  
NUC21: 13C  
P21: 10.00 usec  
PL21: -1.90 dB  
NUC22: 13C  
P22: 10.00 usec  
PL22: -1.90 dB  
NUC23: 13C  
P23: 10.00 usec  
PL23: -1.90 dB  
NUC24: 13C  
P24: 10.00 usec  
PL24: -1.90 dB  
NUC25: 13C  
P25: 10.00 usec  
PL25: -1.90 dB  
NUC26: 13C  
P26: 10.00 usec  
PL26: -1.90 dB  
NUC27: 13C  
P27: 10.00 usec  
PL27: -1.90 dB  
NUC28: 13C  
P28: 10.00 usec  
PL28: -1.90 dB  
NUC29: 13C  
P29: 10.00 usec  
PL29: -1.90 dB  
NUC30: 13C  
P30: 10.00 usec  
PL30: -1.90 dB  
NUC31: 13C  
P31: 10.00 usec  
PL31: -1.90 dB  
NUC32: 13C  
P32: 10.00 usec  
PL32: -1.90 dB  
NUC33: 13C  
P33: 10.00 usec  
PL33: -1.90 dB  
NUC34: 13C  
P34: 10.00 usec  
PL34: -1.90 dB  
NUC35: 13C  
P35: 10.00 usec  
PL35: -1.90 dB  
NUC36: 13C  
P36: 10.00 usec  
PL36: -1.90 dB  
NUC37: 13C  
P37: 10.00 usec  
PL37: -1.90 dB  
NUC38: 13C  
P38: 10.00 usec  
PL38: -1.90 dB  
NUC39: 13C  
P39: 10.00 usec  
PL39: -1.90 dB  
NUC40: 13C  
P40: 10.00 usec  
PL40: -1.90 dB  
NUC41: 13C  
P41: 10.00 usec  
PL41: -1.90 dB  
NUC42: 13C  
P42: 10.00 usec  
PL42: -1.90 dB  
NUC43: 13C  
P43: 10.00 usec  
PL43: -1.90 dB  
NUC44: 13C  
P44: 10.00 usec  
PL44: -1.90 dB  
NUC45: 13C  
P45: 10.00 usec  
PL45: -1.90 dB  
NUC46: 13C  
P46: 10.00 usec  
PL46: -1.90 dB  
NUC47: 13C  
P47: 10.00 usec  
PL47: -1.90 dB  
NUC48: 13C  
P48: 10.00 usec  
PL48: -1.90 dB  
NUC49: 13C  
P49: 10.00 usec  
PL49: -1.90 dB  
NUC50: 13C  
P50: 10.00 usec  
PL50: -1.90 dB  
NUC51: 13C  
P51: 10.00 usec  
PL51: -1.90 dB  
NUC52: 13C  
P52: 10.00 usec  
PL52: -1.90 dB  
NUC53: 13C  
P53: 10.00 usec  
PL53: -1.90 dB  
NUC54: 13C  
P54: 10.00 usec  
PL54: -1.90 dB  
NUC55: 13C  
P55: 10.00 usec  
PL55: -1.90 dB  
NUC56: 13C  
P56: 10.00 usec  
PL56: -1.90 dB  
NUC57: 13C  
P57: 10.00 usec  
PL57: -1.90 dB  
NUC58: 13C  
P58: 10.00 usec  
PL58: -1.90 dB  
NUC59: 13C  
P59: 10.00 usec  
PL59: -1.90 dB  
NUC60: 13C  
P60: 10.00 usec  
PL60: -1.90 dB  
NUC61: 13C  
P61: 10.00 usec  
PL61: -1.90 dB  
NUC62: 13C  
P62: 10.00 usec  
PL62: -1.90 dB  
NUC63: 13C  
P63: 10.00 usec  
PL63: -1.90 dB  
NUC64: 13C  
P64: 10.00 usec  
PL64: -1.90 dB  
NUC65: 13C  
P65: 10.00 usec  
PL65: -1.90 dB  
NUC66: 13C  
P66: 10.00 usec  
PL66: -1.90 dB  
NUC67: 13C  
P67: 10.00 usec  
PL67: -1.90 dB  
NUC68: 13C  
P68: 10.00 usec  
PL68: -1.90 dB  
NUC69: 13C  
P69: 10.00 usec  
PL69: -1.90 dB  
NUC70: 13C  
P70: 10.00 usec  
PL70: -1.90 dB  
NUC71: 13C  
P71: 10.00 usec  
PL71: -1.90 dB  
NUC72: 13C  
P72: 10.00 usec  
PL72: -1.90 dB  
NUC73: 13C  
P73: 10.00 usec  
PL73: -1.90 dB  
NUC74: 13C  
P74: 10.00 usec  
PL74: -1.90 dB  
NUC75: 13C  
P75: 10.00 usec  
PL75: -1.90 dB  
NUC76: 13C  
P76: 10.00 usec  
PL76: -1.90 dB  
NUC77: 13C  
P77: 10.00 usec  
PL77: -1.90 dB  
NUC78: 13C  
P78: 10.00 usec  
PL78: -1.90 dB  
NUC79: 13C  
P79: 10.00 usec  
PL79: -1.90 dB  
NUC80: 13C  
P80: 10.00 usec  
PL80: -1.90 dB  
NUC81: 13C  
P81: 10.00 usec  
PL81: -1.90 dB  
NUC82: 13C  
P82: 10.00 usec  
PL82: -1.90 dB  
NUC83: 13C  
P83: 10.00 usec  
PL83: -1.90 dB  
NUC84: 13C  
P84: 10.00 usec  
PL84: -1.90 dB  
NUC85: 13C  
P85: 10.00 usec  
PL85: -1.90 dB  
NUC86: 13C  
P86: 10.00 usec  
PL86: -1.90 dB  
NUC87: 13C  
P87: 10.00 usec  
PL87: -1.90 dB  
NUC88: 13C  
P88: 10.00 usec  
PL88: -1.90 dB  
NUC89: 13C  
P89: 10.00 usec  
PL89: -1.90 dB  
NUC90: 13C  
P90: 10.00 usec  
PL90: -1.90 dB  
NUC91: 13C  
P91: 10.00 usec  
PL91: -1.90 dB  
NUC92: 13C  
P92: 10.00 usec  
PL92: -1.90 dB  
NUC93: 13C  
P93: 10.00 usec  
PL93: -1.90 dB  
NUC94: 13C  
P94: 10.00 usec  
PL94: -1.90 dB  
NUC95: 13C  
P95: 10.00 usec  
PL95: -1.90 dB  
NUC96: 13C  
P96: 10.00 usec  
PL96: -1.90 dB  
NUC97: 13C  
P97: 10.00 usec  
PL97: -1.90 dB  
NUC98: 13C  
P98: 10.00 usec  
PL98: -1.90 dB  
NUC99: 13C  
P99: 10.00 usec  
PL99: -1.90 dB  
NUC100: 13C  
P100: 10.00 usec  
PL100: -1.90 dB

XianFu Li E28 DSAMPLE ref. XL5-95 in DMSO-d6 at 100 deg.

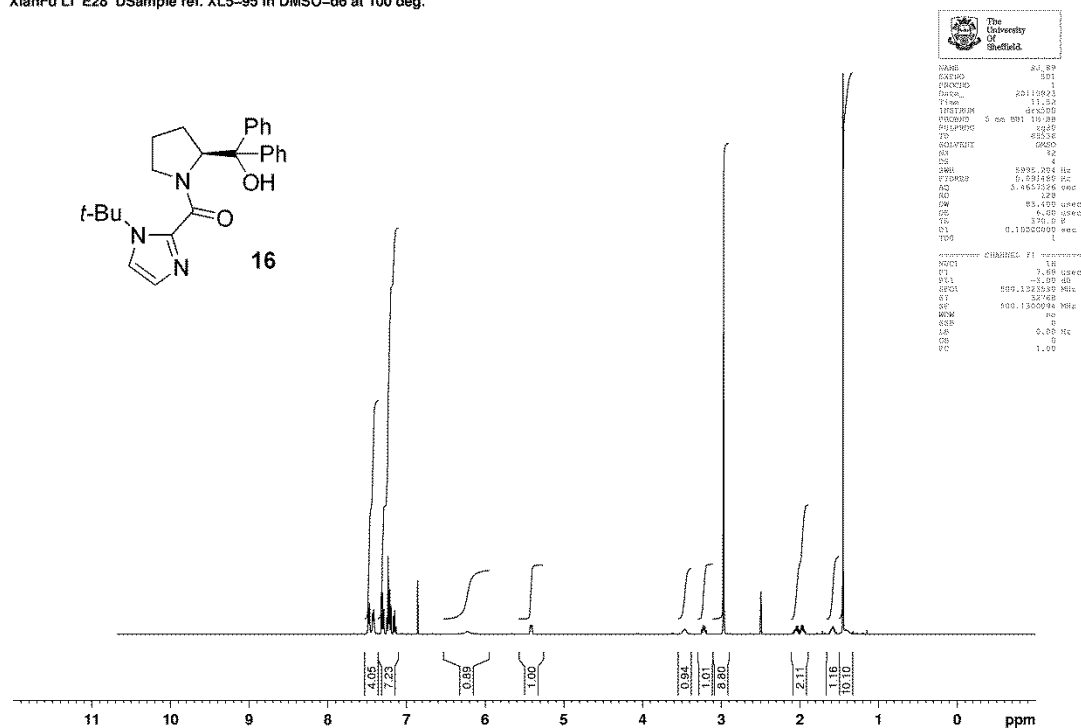

XianFu Li E28 Sample ref. XL5-95 in DMSO at 100 deg. C  
Backwards linear prediction parameters: NCOEF = 2048 TDOFF = 32

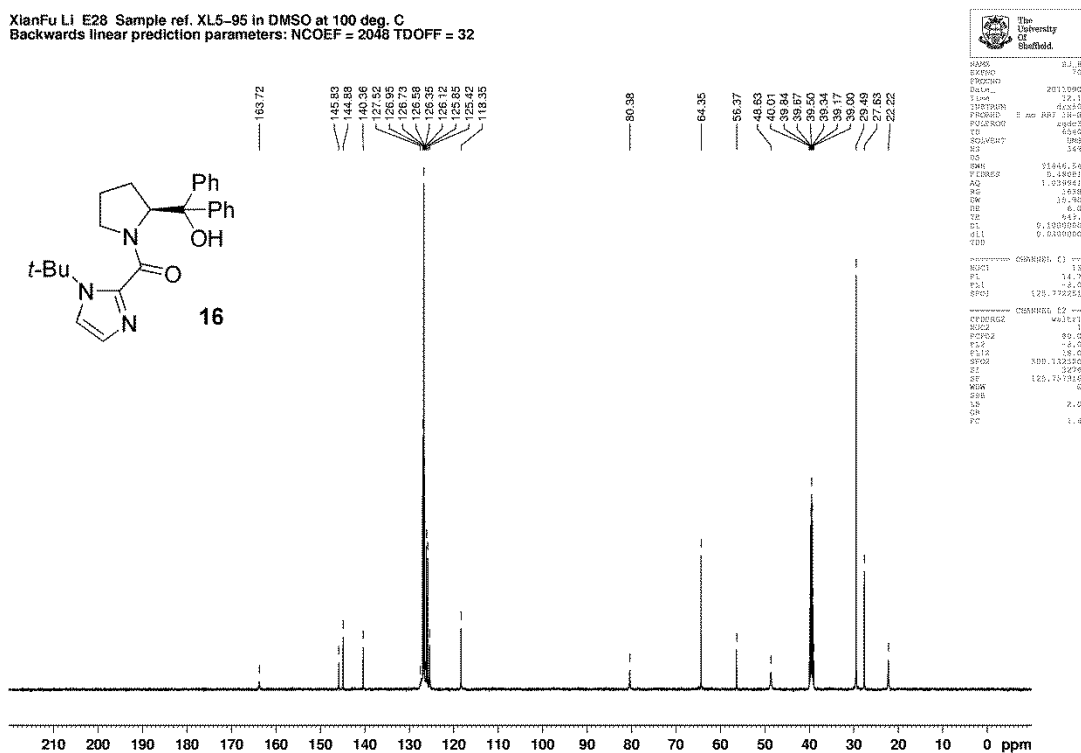

XL3-76 400MHz  
PRO CDCl<sub>3</sub> {C:04ap2010} ch3sj 22

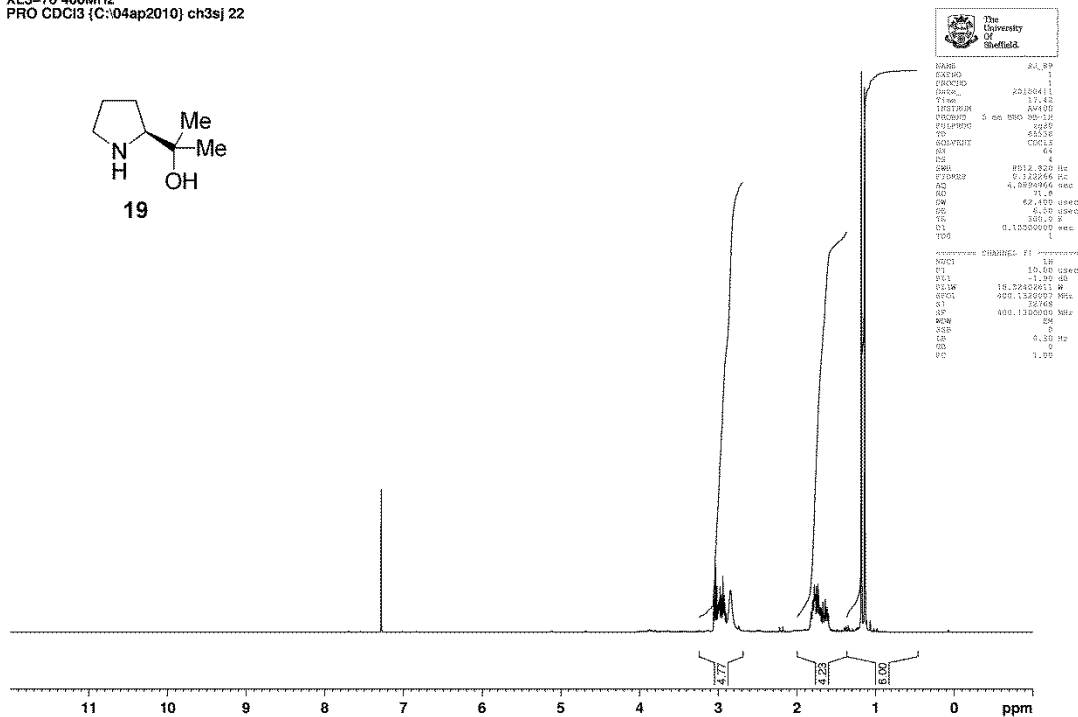

XL3-76 400MHz  
JMOD250PPM CDCl<sub>3</sub> {C:04ap2010} ch3sj 22

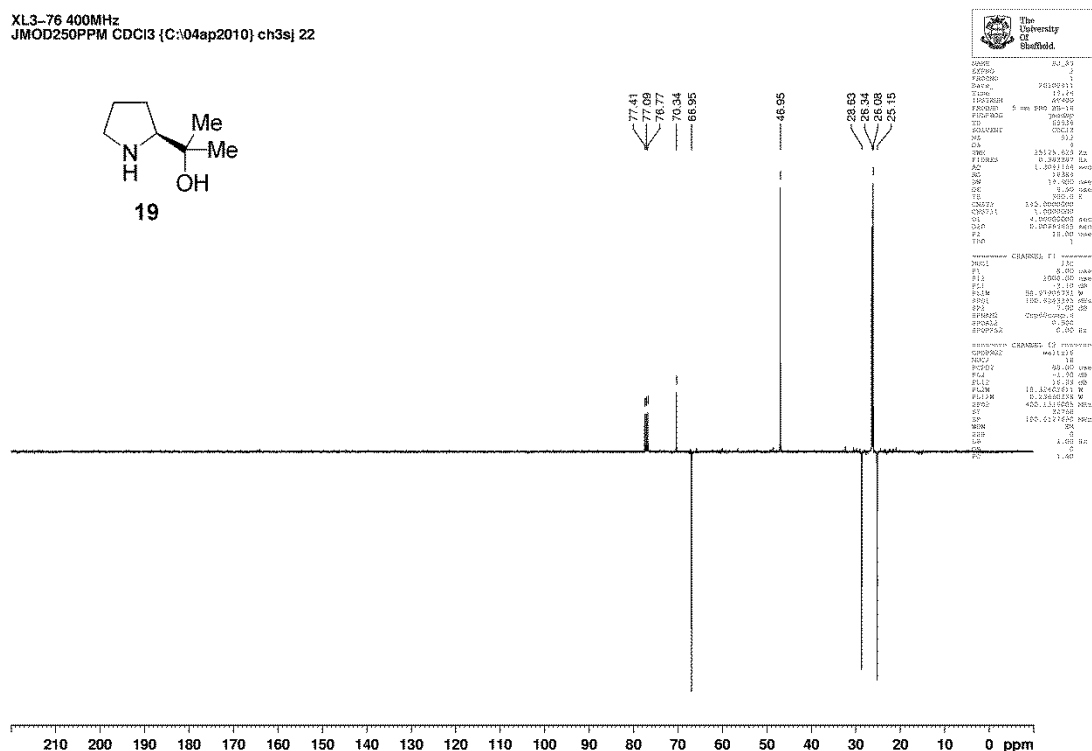

XianFu Li E75 Sample ref. XL3-79 in DMSO at 100 deg. C

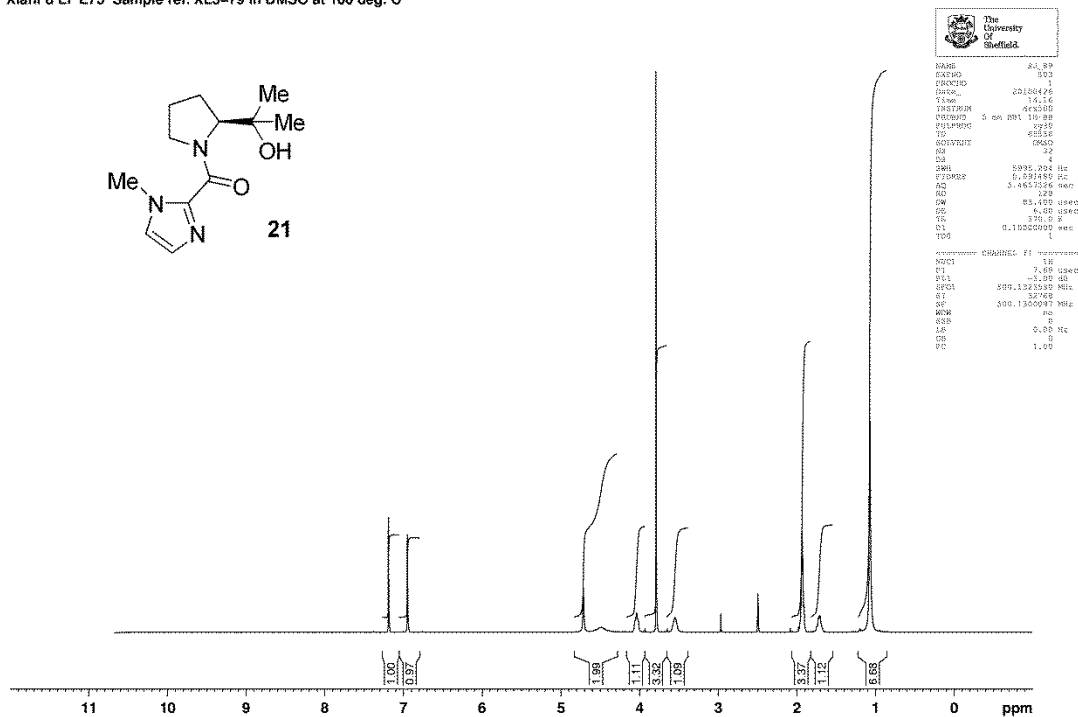

XianFu Li E75 Sample ref. XL3-79 in DMSO at 100 deg. C  
Backwards linear prediction parameters: NCOEF = 2048 TDOFF = 32

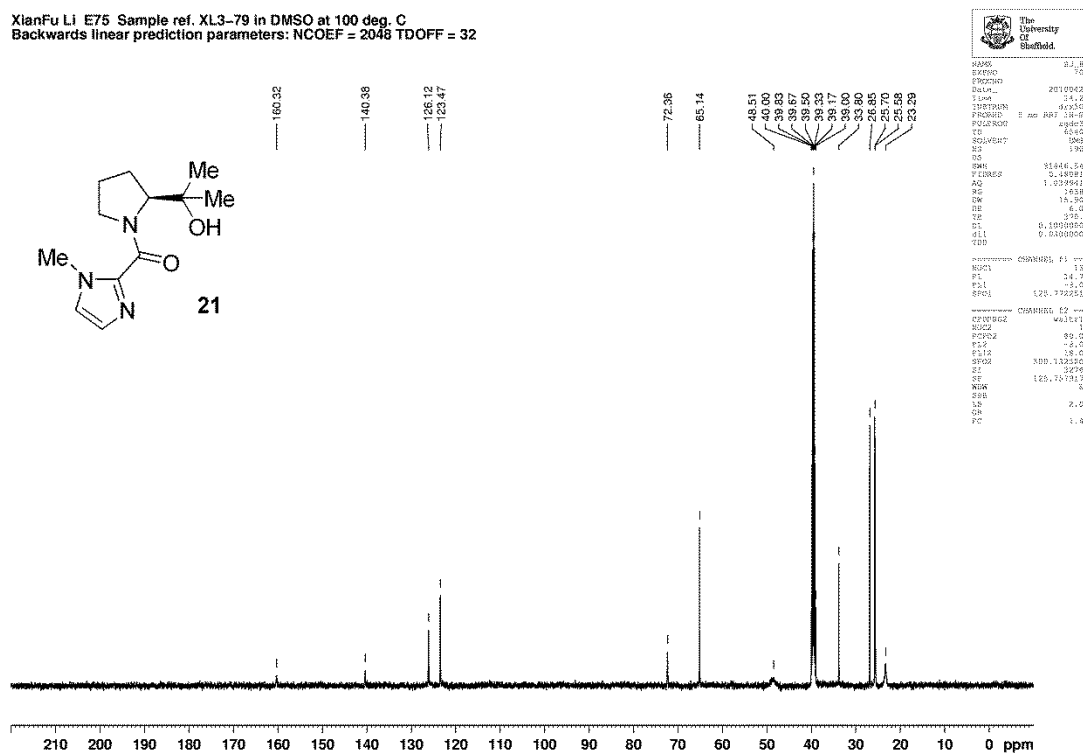



The University  
Of  
Sheffield.

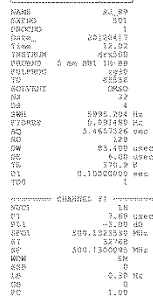

The  
University  
of  
Sheffield.

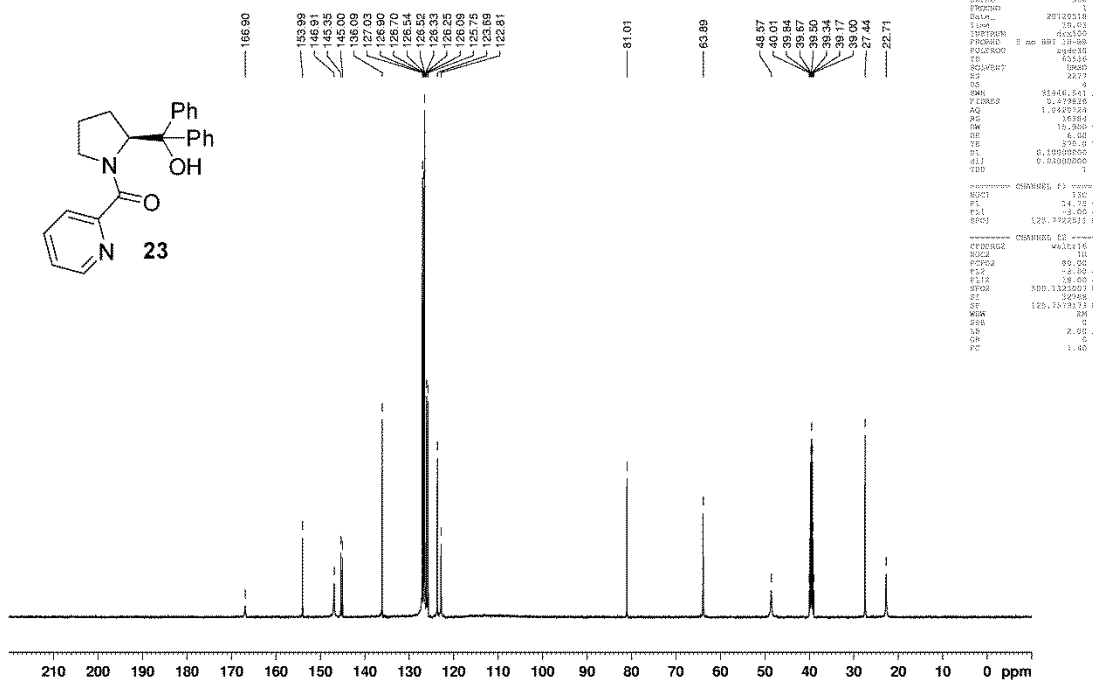

XL5-75  
PRO CDCl3 {C:\08au2011\} ch3sj 47

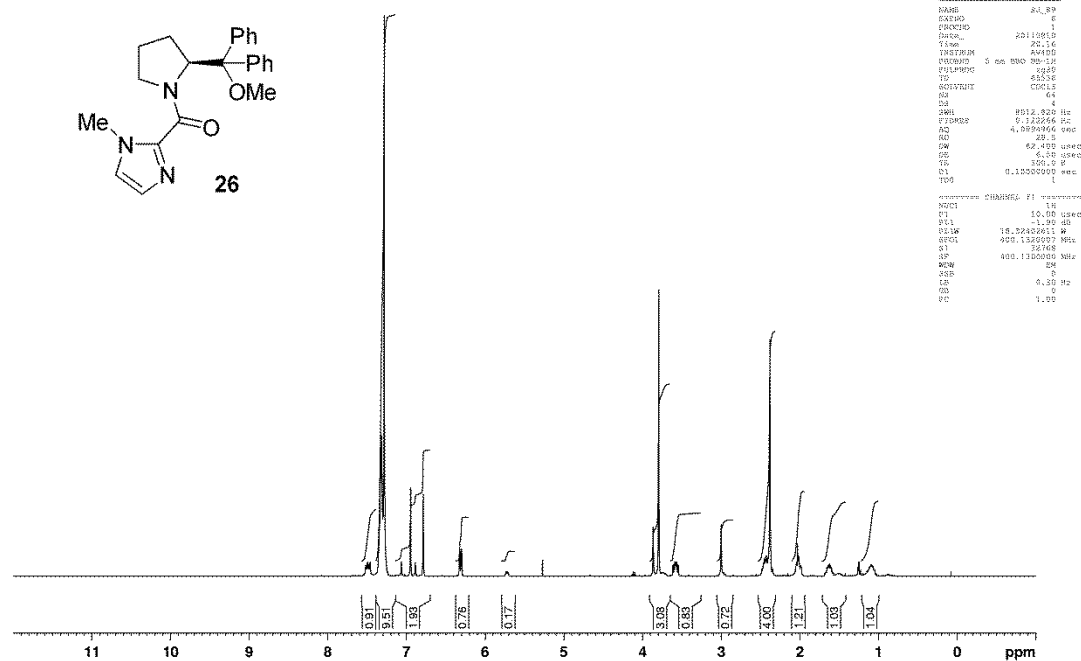

XL5-75  
JMOD250PPM CDCl3 {C:\08au2011\} ch3sj 47

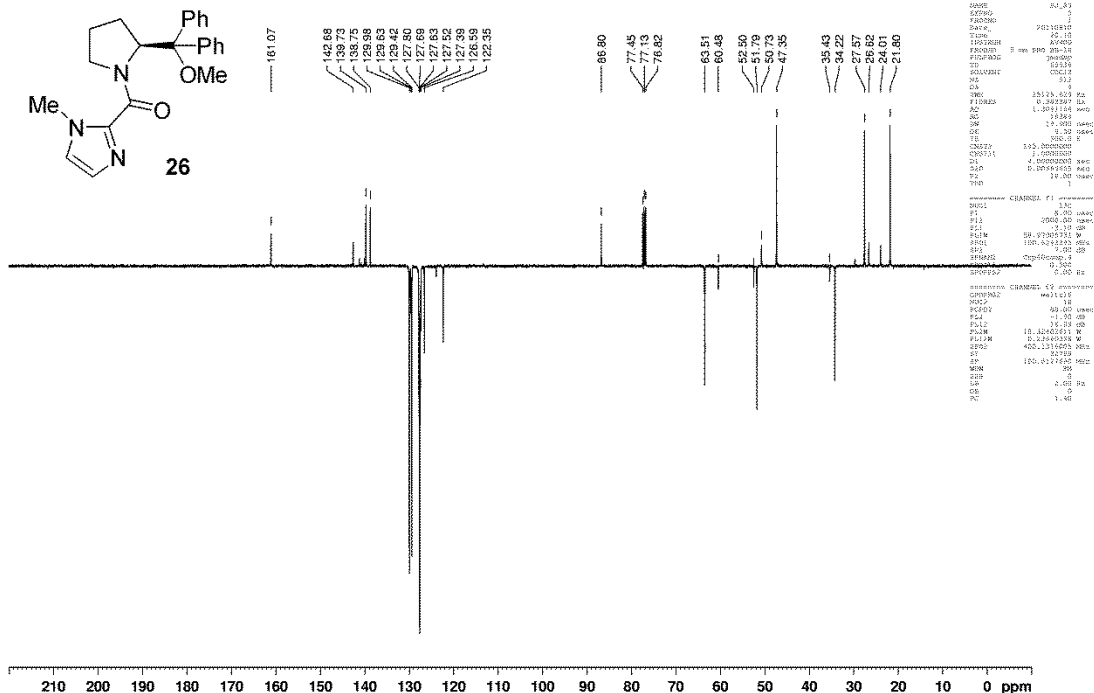

COC(=O)N1CCCC1[C@H](C1=CC=CC=C1)C1=CC=CC=C1

1H NMR spectrum (400 MHz, CDCl<sub>3</sub>) of compound 27. The chemical structure of 27 is shown above the spectrum. The spectrum displays peaks in the aromatic region (7.0-7.5 ppm), a methoxy singlet (3.8 ppm), and aliphatic signals (1.5-2.5 ppm). Integration values are provided below the baseline.

| Chemical Shift (ppm) | Integration |
|----------------------|-------------|
| 7.40                 | 0.53        |
| 7.35                 | 0.98        |
| 7.25                 | 2.07        |
| 7.20                 | 1.11        |
| 7.15                 | 1.26        |
| 7.10                 | 20.82       |
| 5.80                 | 0.99        |
| 5.60                 | 0.52        |
| 3.80                 | 1.00        |
| 3.20                 | 0.56        |
| 3.00                 | 1.63        |
| 2.80                 | 0.54        |
| 2.20                 | 7.40        |
| 1.80                 | 2.27        |
| 1.50                 | 1.66        |

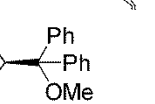
  
**27**



| Chemical Shift (ppm) |
|----------------------|
| 165.18               |
| 163.54               |
| 156.62               |
| 155.00               |
| 148.68               |
| 148.87               |
| 148.87               |
| 140.48               |
| 139.57               |
| 138.40               |
| 138.49               |
| 138.57               |
| 138.89               |
| 138.89               |
| 129.75               |
| 129.56               |
| 127.86               |
| 127.86               |
| 127.70               |
| 127.65               |
| 127.55               |
| 127.33               |
| 127.26               |
| 127.26               |
| 124.28               |
| 123.73               |
| 87.00                |
| 86.48                |
| 77.49                |
| 77.37                |
| 77.17                |
| 76.85                |
| 63.95                |
| 59.76                |
| 52.34                |
| 50.69                |
| 50.59                |
| 47.74                |
| 27.84                |
| 26.89                |
| 23.96                |
| 21.61                |



XLp-F using XI006 as catalyst  
PRO CDCl<sub>3</sub> [C:\04ap2009] ch3sj 8

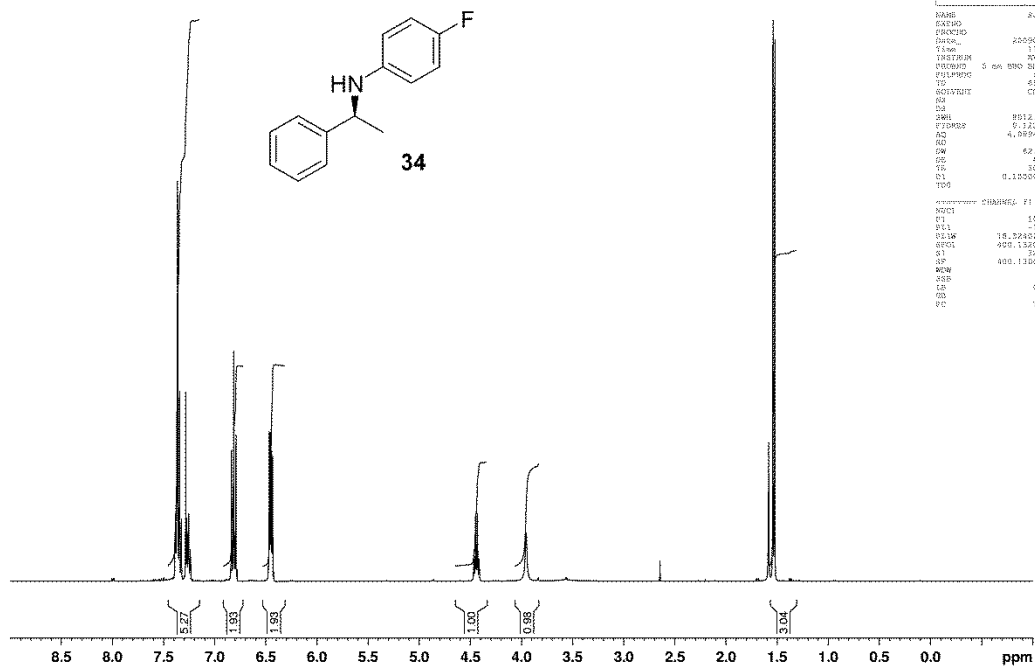

|                             |                |
|-----------------------------|----------------|
| The University of Sheffield |                |
| NAME                        | 34_89          |
| EXPNO                       | 2              |
| PROCNO                      | 1              |
| INSTR                       | 200004032      |
| TIME                        | 11.17          |
| INSTRUM                     | QNP400         |
| PROBHD                      | 5 mm BBO BB-1H |
| NUC1                        | 13C            |
| TD                          | 43236          |
| SOLVENT                     | CDCl3          |
| DS                          | 4              |
| SWH                         | 1012.820 Hz    |
| F2                          | 50.140000 MHz  |
| RG                          | 4.000000 sec   |
| AD                          | 256            |
| SW                          | 62.150000 sec  |
| DE                          | 6.000000 sec   |
| TE                          | 300.2 K        |
| Q1                          | 0.1000000 sec  |
| Q2                          | 1              |
| ===== CHANNEL F1 =====      |                |
| NUC1                        | 1H             |
| TD                          | 10.000000      |
| PUL                         | 1.000000       |
| PL1                         | 18.000000 dB   |
| PL2                         | 18.000000 dB   |
| PL3                         | 18.000000 dB   |
| PL4                         | 18.000000 dB   |
| PL5                         | 18.000000 dB   |
| PL6                         | 18.000000 dB   |
| PL7                         | 18.000000 dB   |
| PL8                         | 18.000000 dB   |
| PL9                         | 18.000000 dB   |
| PL10                        | 18.000000 dB   |
| PL11                        | 18.000000 dB   |
| PL12                        | 18.000000 dB   |
| PL13                        | 18.000000 dB   |
| PL14                        | 18.000000 dB   |
| PL15                        | 18.000000 dB   |
| PL16                        | 18.000000 dB   |
| PL17                        | 18.000000 dB   |
| PL18                        | 18.000000 dB   |
| PL19                        | 18.000000 dB   |
| PL20                        | 18.000000 dB   |
| PL21                        | 18.000000 dB   |
| PL22                        | 18.000000 dB   |
| PL23                        | 18.000000 dB   |
| PL24                        | 18.000000 dB   |
| PL25                        | 18.000000 dB   |
| PL26                        | 18.000000 dB   |
| PL27                        | 18.000000 dB   |
| PL28                        | 18.000000 dB   |
| PL29                        | 18.000000 dB   |
| PL30                        | 18.000000 dB   |
| PL31                        | 18.000000 dB   |
| PL32                        | 18.000000 dB   |
| PL33                        | 18.000000 dB   |
| PL34                        | 18.000000 dB   |
| PL35                        | 18.000000 dB   |
| PL36                        | 18.000000 dB   |
| PL37                        | 18.000000 dB   |
| PL38                        | 18.000000 dB   |
| PL39                        | 18.000000 dB   |
| PL40                        | 18.000000 dB   |
| PL41                        | 18.000000 dB   |
| PL42                        | 18.000000 dB   |
| PL43                        | 18.000000 dB   |
| PL44                        | 18.000000 dB   |
| PL45                        | 18.000000 dB   |
| PL46                        | 18.000000 dB   |
| PL47                        | 18.000000 dB   |
| PL48                        | 18.000000 dB   |
| PL49                        | 18.000000 dB   |
| PL50                        | 18.000000 dB   |
| PL51                        | 18.000000 dB   |
| PL52                        | 18.000000 dB   |
| PL53                        | 18.000000 dB   |
| PL54                        | 18.000000 dB   |
| PL55                        | 18.000000 dB   |
| PL56                        | 18.000000 dB   |
| PL57                        | 18.000000 dB   |
| PL58                        | 18.000000 dB   |
| PL59                        | 18.000000 dB   |
| PL60                        | 18.000000 dB   |
| PL61                        | 18.000000 dB   |
| PL62                        | 18.000000 dB   |
| PL63                        | 18.000000 dB   |
| PL64                        | 18.000000 dB   |
| PL65                        | 18.000000 dB   |
| PL66                        | 18.000000 dB   |
| PL67                        | 18.000000 dB   |
| PL68                        | 18.000000 dB   |
| PL69                        | 18.000000 dB   |
| PL70                        | 18.000000 dB   |
| PL71                        | 18.000000 dB   |
| PL72                        | 18.000000 dB   |
| PL73                        | 18.000000 dB   |
| PL74                        | 18.000000 dB   |
| PL75                        | 18.000000 dB   |
| PL76                        | 18.000000 dB   |
| PL77                        | 18.000000 dB   |
| PL78                        | 18.000000 dB   |
| PL79                        | 18.000000 dB   |
| PL80                        | 18.000000 dB   |
| PL81                        | 18.000000 dB   |
| PL82                        | 18.000000 dB   |
| PL83                        | 18.000000 dB   |
| PL84                        | 18.000000 dB   |
| PL85                        | 18.000000 dB   |
| PL86                        | 18.000000 dB   |
| PL87                        | 18.000000 dB   |
| PL88                        | 18.000000 dB   |
| PL89                        | 18.000000 dB   |
| PL90                        | 18.000000 dB   |
| PL91                        | 18.000000 dB   |
| PL92                        | 18.000000 dB   |
| PL93                        | 18.000000 dB   |
| PL94                        | 18.000000 dB   |
| PL95                        | 18.000000 dB   |
| PL96                        | 18.000000 dB   |
| PL97                        | 18.000000 dB   |
| PL98                        | 18.000000 dB   |
| PL99                        | 18.000000 dB   |
| PL100                       | 18.000000 dB   |

XL078 400MHz  
JMOD250PPM CDCl<sub>3</sub> [C:\04ap2009] ch3sj 53

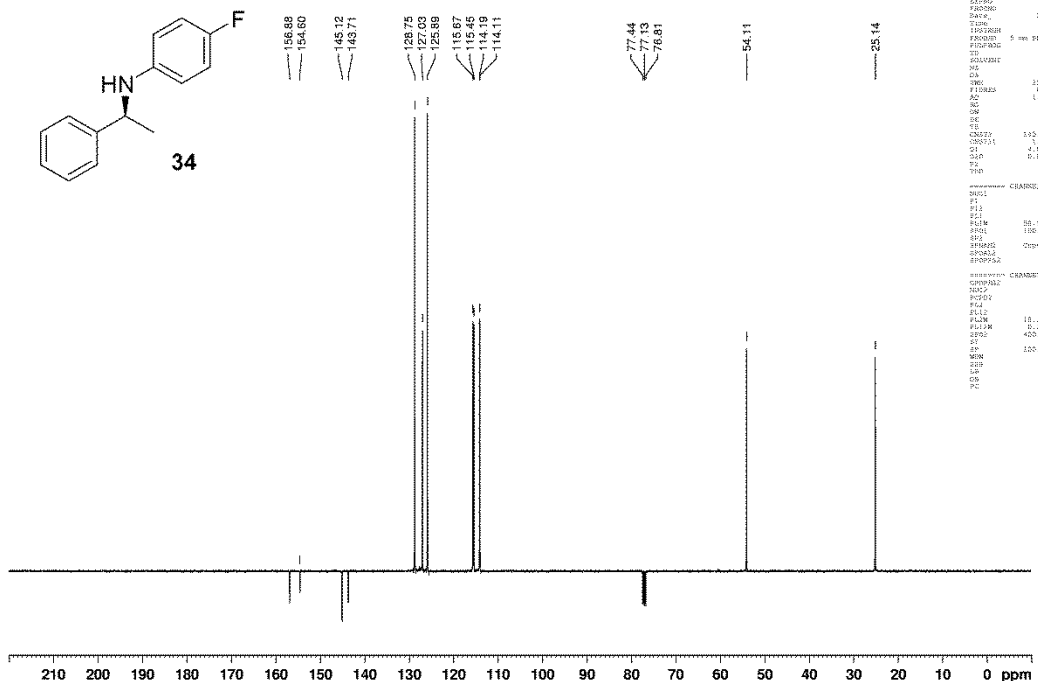

|                             |                |
|-----------------------------|----------------|
| The University of Sheffield |                |
| NAME                        | 34_53          |
| EXPNO                       | 2              |
| PROCNO                      | 1              |
| INSTR                       | 200004032      |
| TIME                        | 11.17          |
| INSTRUM                     | QNP400         |
| PROBHD                      | 5 mm BBO BB-1H |
| NUC1                        | 13C            |
| TD                          | 43236          |
| SOLVENT                     | CDCl3          |
| DS                          | 4              |
| SWH                         | 1012.820 Hz    |
| F2                          | 50.140000 MHz  |
| RG                          | 4.000000 sec   |
| AD                          | 256            |
| SW                          | 62.150000 sec  |
| DE                          | 6.000000 sec   |
| TE                          | 300.2 K        |
| Q1                          | 0.1000000 sec  |
| Q2                          | 1              |
| ===== CHANNEL F1 =====      |                |
| NUC1                        | 13C            |
| TD                          | 10.000000      |
| PUL                         | 1.000000       |
| PL1                         | 18.000000 dB   |
| PL2                         | 18.000000 dB   |
| PL3                         | 18.000000 dB   |
| PL4                         | 18.000000 dB   |
| PL5                         | 18.000000 dB   |
| PL6                         | 18.000000 dB   |
| PL7                         | 18.000000 dB   |
| PL8                         | 18.000000 dB   |
| PL9                         | 18.000000 dB   |
| PL10                        | 18.000000 dB   |
| PL11                        | 18.000000 dB   |
| PL12                        | 18.000000 dB   |
| PL13                        | 18.000000 dB   |
| PL14                        | 18.000000 dB   |
| PL15                        | 18.000000 dB   |
| PL16                        | 18.000000 dB   |
| PL17                        | 18.000000 dB   |
| PL18                        | 18.000000 dB   |
| PL19                        | 18.000000 dB   |
| PL20                        | 18.000000 dB   |
| PL21                        | 18.000000 dB   |
| PL22                        | 18.000000 dB   |
| PL23                        | 18.000000 dB   |
| PL24                        | 18.000000 dB   |
| PL25                        | 18.000000 dB   |
| PL26                        | 18.000000 dB   |
| PL27                        | 18.000000 dB   |
| PL28                        | 18.000000 dB   |
| PL29                        | 18.000000 dB   |
| PL30                        | 18.000000 dB   |
| PL31                        | 18.000000 dB   |
| PL32                        | 18.000000 dB   |
| PL33                        | 18.000000 dB   |
| PL34                        | 18.000000 dB   |
| PL35                        | 18.000000 dB   |
| PL36                        | 18.000000 dB   |
| PL37                        | 18.000000 dB   |
| PL38                        | 18.000000 dB   |
| PL39                        | 18.000000 dB   |
| PL40                        | 18.000000 dB   |
| PL41                        | 18.000000 dB   |
| PL42                        | 18.000000 dB   |
| PL43                        | 18.000000 dB   |
| PL44                        | 18.000000 dB   |
| PL45                        | 18.000000 dB   |
| PL46                        | 18.000000 dB   |
| PL47                        | 18.000000 dB   |
| PL48                        | 18.000000 dB   |
| PL49                        | 18.000000 dB   |
| PL50                        | 18.000000 dB   |
| PL51                        | 18.000000 dB   |
| PL52                        | 18.000000 dB   |
| PL53                        | 18.000000 dB   |
| PL54                        | 18.000000 dB   |
| PL55                        | 18.000000 dB   |
| PL56                        | 18.000000 dB   |
| PL57                        | 18.000000 dB   |
| PL58                        | 18.000000 dB   |
| PL59                        | 18.000000 dB   |
| PL60                        | 18.000000 dB   |
| PL61                        | 18.000000 dB   |
| PL62                        | 18.000000 dB   |
| PL63                        | 18.000000 dB   |
| PL64                        | 18.000000 dB   |
| PL65                        | 18.000000 dB   |
| PL66                        | 18.000000 dB   |
| PL67                        | 18.000000 dB   |
| PL68                        | 18.000000 dB   |
| PL69                        | 18.000000 dB   |
| PL70                        | 18.000000 dB   |
| PL71                        | 18.000000 dB   |
| PL72                        | 18.000000 dB   |
| PL73                        | 18.000000 dB   |
| PL74                        | 18.000000 dB   |
| PL75                        | 18.000000 dB   |
| PL76                        | 18.000000 dB   |
| PL77                        | 18.000000 dB   |
| PL78                        | 18.000000 dB   |
| PL79                        | 18.000000 dB   |
| PL80                        | 18.000000 dB   |
| PL81                        | 18.000000 dB   |
| PL82                        | 18.000000 dB   |
| PL83                        | 18.000000 dB   |
| PL84                        | 18.000000 dB   |
| PL85                        | 18.000000 dB   |
| PL86                        | 18.000000 dB   |
| PL87                        | 18.000000 dB   |
| PL88                        | 18.000000 dB   |
| PL89                        | 18.000000 dB   |
| PL90                        | 18.000000 dB   |
| PL91                        | 18.000000 dB   |
| PL92                        | 18.000000 dB   |
| PL93                        | 18.000000 dB   |
| PL94                        | 18.000000 dB   |
| PL95                        | 18.000000 dB   |
| PL96                        | 18.000000 dB   |
| PL97                        | 18.000000 dB   |
| PL98                        | 18.000000 dB   |
| PL99                        | 18.000000 dB   |
| PL100                       | 18.000000 dB   |

XL3-37 250MHz  
PRO CDCl<sub>3</sub> {C:01ja2010} ch3sj 1

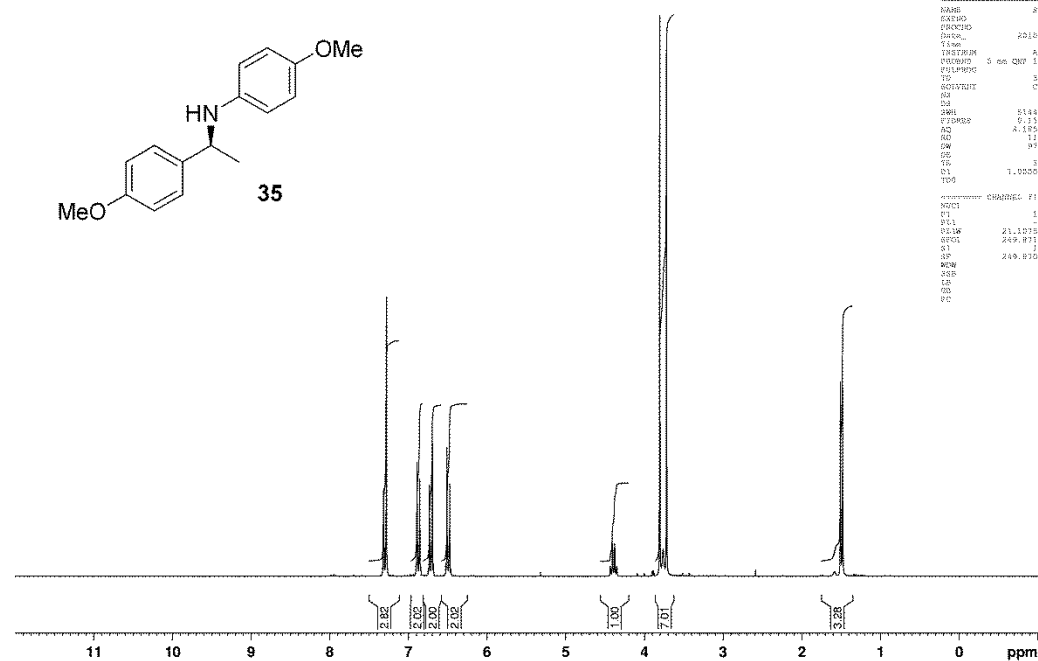

|         |                |
|---------|----------------|
| NAME    | XL3-37         |
| EXPNO   | 1              |
| PROCNO  | 1              |
| DATE_   | 20100120       |
| TIME    | 9.23           |
| INSTRUM | AVANCE         |
| PROBHD  | 5 mm QNP 1H/13 |
| PULPROG | zgpg30         |
| TD      | 32768          |
| DELTA   | 0.001          |
| RG      | 64             |
| DS      | 4              |
| SWH     | 514.033 Hz     |
| F2      | 125.761 MHz    |
| NUC1    | 13C            |
| NUC2    | 1H             |
| PC      | 1.00           |
| PD      | 1.00           |
| PE      | 1.00           |
| PF      | 1.00           |
| PG      | 1.00           |
| PH      | 1.00           |
| PI      | 1.00           |
| PJ      | 1.00           |
| PK      | 1.00           |
| PL      | 1.00           |
| PM      | 1.00           |
| PN      | 1.00           |
| PO      | 1.00           |
| PP      | 1.00           |
| PQ      | 1.00           |
| PR      | 1.00           |
| PS      | 1.00           |
| PT      | 1.00           |
| PV      | 1.00           |
| PW      | 1.00           |
| PX      | 1.00           |
| PY      | 1.00           |
| PZ      | 1.00           |

XL3-39 250MHz  
JMOD250PPM CDCl<sub>3</sub> {C:01ja2010} ch3sj 48

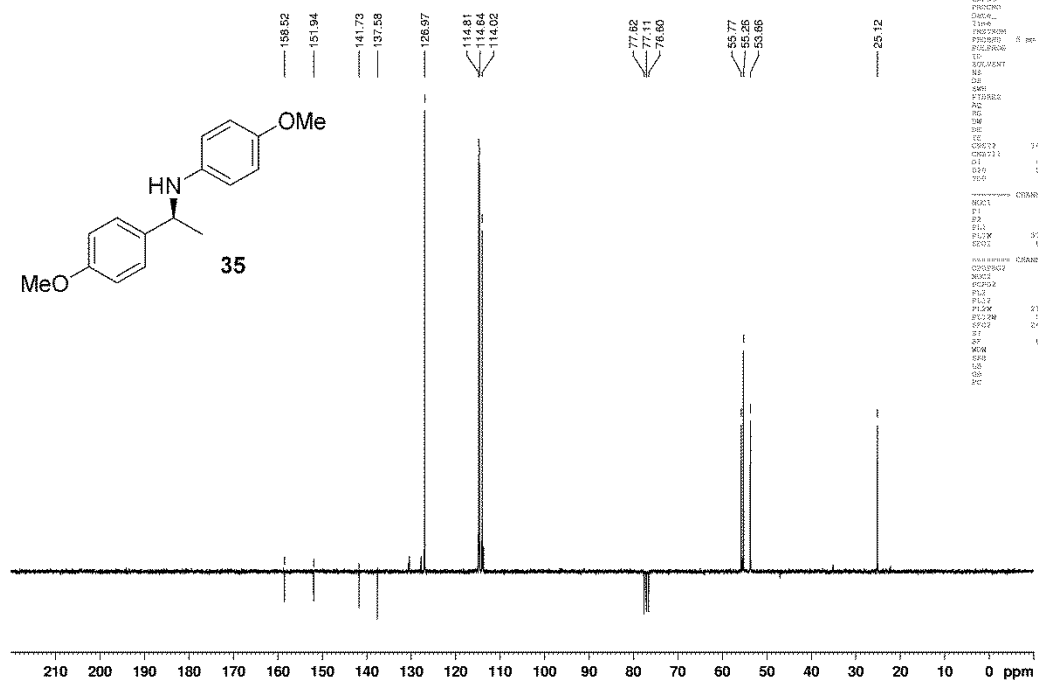

|         |                |
|---------|----------------|
| NAME    | XL3-39         |
| EXPNO   | 1              |
| PROCNO  | 1              |
| DATE_   | 20100120       |
| TIME    | 9.23           |
| INSTRUM | AVANCE         |
| PROBHD  | 5 mm QNP 1H/13 |
| PULPROG | zgpg30         |
| TD      | 32768          |
| DELTA   | 0.001          |
| RG      | 64             |
| DS      | 4              |
| SWH     | 15723.271 Hz   |
| F2      | 125.761 MHz    |
| NUC1    | 13C            |
| NUC2    | 1H             |
| PC      | 1.00           |
| PD      | 1.00           |
| PE      | 1.00           |
| PF      | 1.00           |
| PG      | 1.00           |
| PH      | 1.00           |
| PI      | 1.00           |
| PJ      | 1.00           |
| PK      | 1.00           |
| PL      | 1.00           |
| PM      | 1.00           |
| PN      | 1.00           |
| PO      | 1.00           |
| PP      | 1.00           |
| PQ      | 1.00           |
| PR      | 1.00           |
| PS      | 1.00           |
| PT      | 1.00           |
| PV      | 1.00           |
| PW      | 1.00           |
| PX      | 1.00           |
| PY      | 1.00           |
| PZ      | 1.00           |

COc1ccc(N[C@H](C)c2ccc([N+](=O)[O-])cc2)cc1

**36**

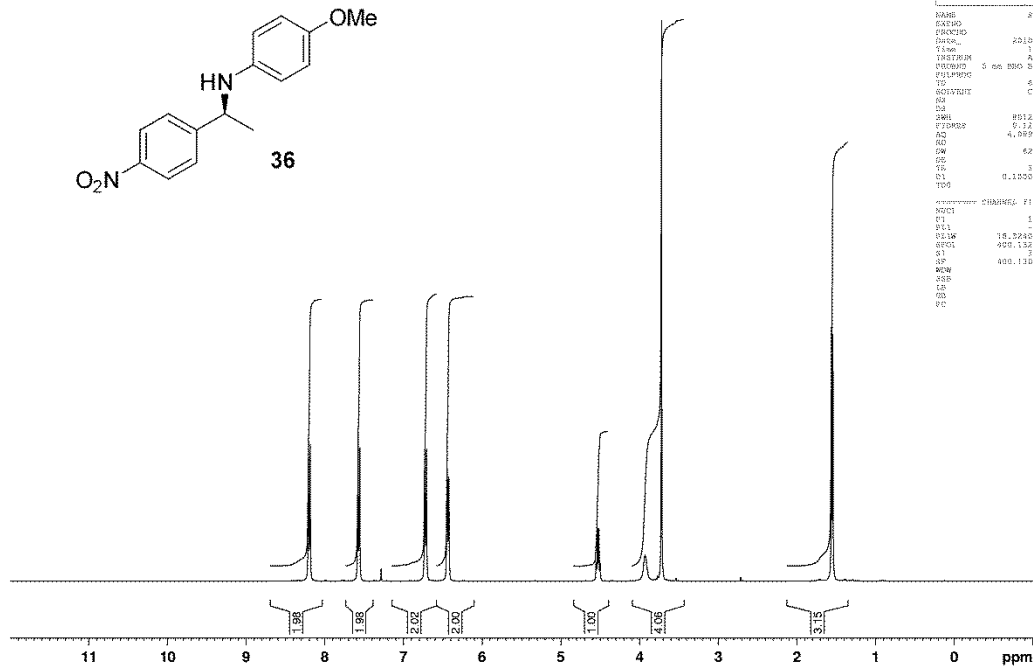

**36**

C[C@H](Nc1ccc(OC)cc1)c2ccc([N+](=O)[O-])cc2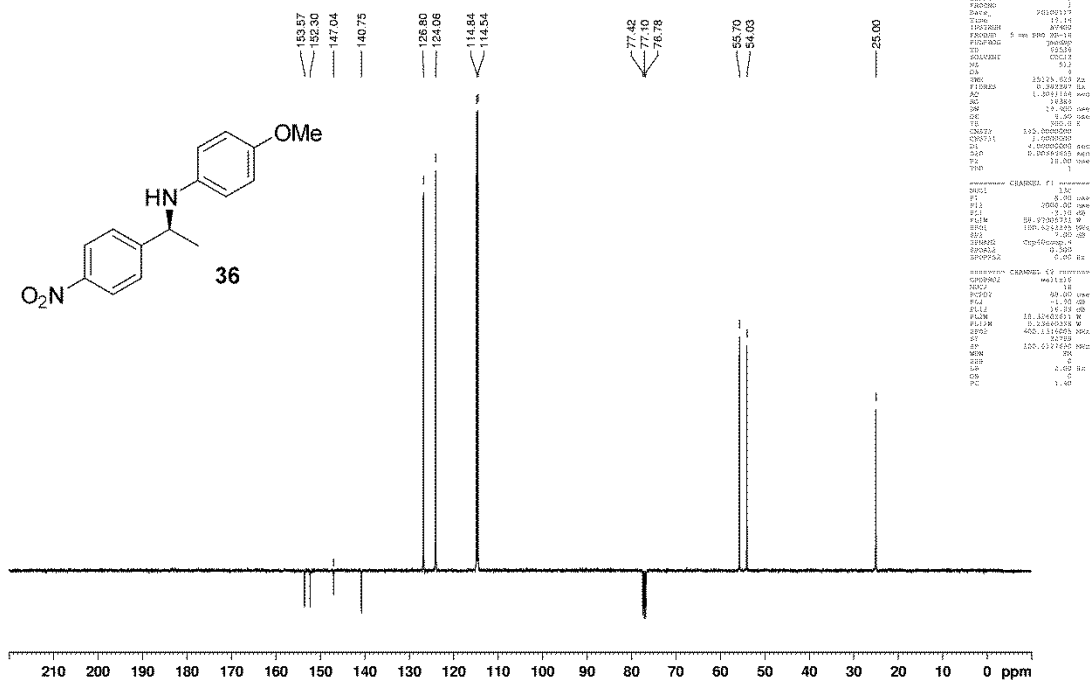

XL3-66 250MHz  
PRO CDCl3 {C:03mr2010} ch3s] 58

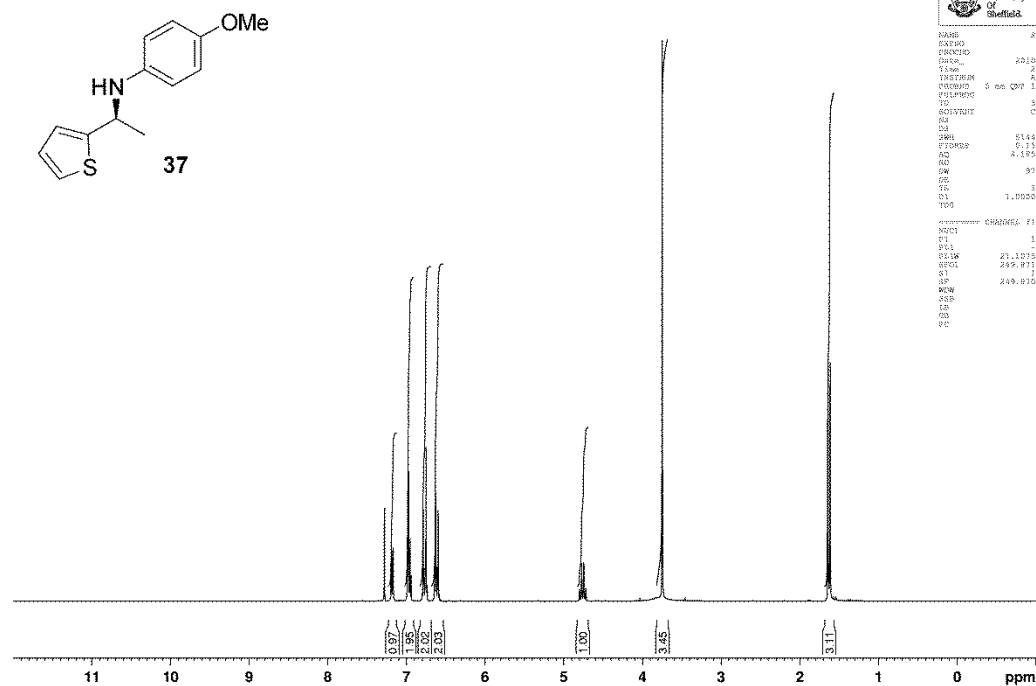

|                             |                |
|-----------------------------|----------------|
| The University of Sheffield |                |
| NAME                        | 37             |
| EXPNO                       | 1              |
| PROCNO                      | 1              |
| DATE_                       | 20100304       |
| TIME                        | 20.29          |
| INSTRUM                     | QNP1H          |
| PROBHD                      | 5 mm QNP 1H/13 |
| NUC1                        | 13C            |
| NUC2                        | 1H             |
| Q1                          | 1.00000000     |
| Q2                          | 1.00000000     |
| Q3                          | 1.00000000     |
| Q4                          | 1.00000000     |
| Q5                          | 1.00000000     |
| Q6                          | 1.00000000     |
| Q7                          | 1.00000000     |
| Q8                          | 1.00000000     |
| Q9                          | 1.00000000     |
| Q10                         | 1.00000000     |
| Q11                         | 1.00000000     |
| Q12                         | 1.00000000     |
| Q13                         | 1.00000000     |
| Q14                         | 1.00000000     |
| Q15                         | 1.00000000     |
| Q16                         | 1.00000000     |
| Q17                         | 1.00000000     |
| Q18                         | 1.00000000     |
| Q19                         | 1.00000000     |
| Q20                         | 1.00000000     |
| Q21                         | 1.00000000     |
| Q22                         | 1.00000000     |
| Q23                         | 1.00000000     |
| Q24                         | 1.00000000     |
| Q25                         | 1.00000000     |
| Q26                         | 1.00000000     |
| Q27                         | 1.00000000     |
| Q28                         | 1.00000000     |
| Q29                         | 1.00000000     |
| Q30                         | 1.00000000     |
| Q31                         | 1.00000000     |
| Q32                         | 1.00000000     |
| Q33                         | 1.00000000     |
| Q34                         | 1.00000000     |
| Q35                         | 1.00000000     |
| Q36                         | 1.00000000     |
| Q37                         | 1.00000000     |
| Q38                         | 1.00000000     |
| Q39                         | 1.00000000     |
| Q40                         | 1.00000000     |
| Q41                         | 1.00000000     |
| Q42                         | 1.00000000     |
| Q43                         | 1.00000000     |
| Q44                         | 1.00000000     |
| Q45                         | 1.00000000     |
| Q46                         | 1.00000000     |
| Q47                         | 1.00000000     |
| Q48                         | 1.00000000     |
| Q49                         | 1.00000000     |
| Q50                         | 1.00000000     |
| Q51                         | 1.00000000     |
| Q52                         | 1.00000000     |
| Q53                         | 1.00000000     |
| Q54                         | 1.00000000     |
| Q55                         | 1.00000000     |
| Q56                         | 1.00000000     |
| Q57                         | 1.00000000     |
| Q58                         | 1.00000000     |
| Q59                         | 1.00000000     |
| Q60                         | 1.00000000     |
| Q61                         | 1.00000000     |
| Q62                         | 1.00000000     |
| Q63                         | 1.00000000     |
| Q64                         | 1.00000000     |
| Q65                         | 1.00000000     |
| Q66                         | 1.00000000     |
| Q67                         | 1.00000000     |
| Q68                         | 1.00000000     |
| Q69                         | 1.00000000     |
| Q70                         | 1.00000000     |
| Q71                         | 1.00000000     |
| Q72                         | 1.00000000     |
| Q73                         | 1.00000000     |
| Q74                         | 1.00000000     |
| Q75                         | 1.00000000     |
| Q76                         | 1.00000000     |
| Q77                         | 1.00000000     |
| Q78                         | 1.00000000     |
| Q79                         | 1.00000000     |
| Q80                         | 1.00000000     |
| Q81                         | 1.00000000     |
| Q82                         | 1.00000000     |
| Q83                         | 1.00000000     |
| Q84                         | 1.00000000     |
| Q85                         | 1.00000000     |
| Q86                         | 1.00000000     |
| Q87                         | 1.00000000     |
| Q88                         | 1.00000000     |
| Q89                         | 1.00000000     |
| Q90                         | 1.00000000     |
| Q91                         | 1.00000000     |
| Q92                         | 1.00000000     |
| Q93                         | 1.00000000     |
| Q94                         | 1.00000000     |
| Q95                         | 1.00000000     |
| Q96                         | 1.00000000     |
| Q97                         | 1.00000000     |
| Q98                         | 1.00000000     |
| Q99                         | 1.00000000     |
| Q100                        | 1.00000000     |

XL3-66 250MHz  
JMOD250PPM CDCl3 {C:03mr2010} ch3s] 3

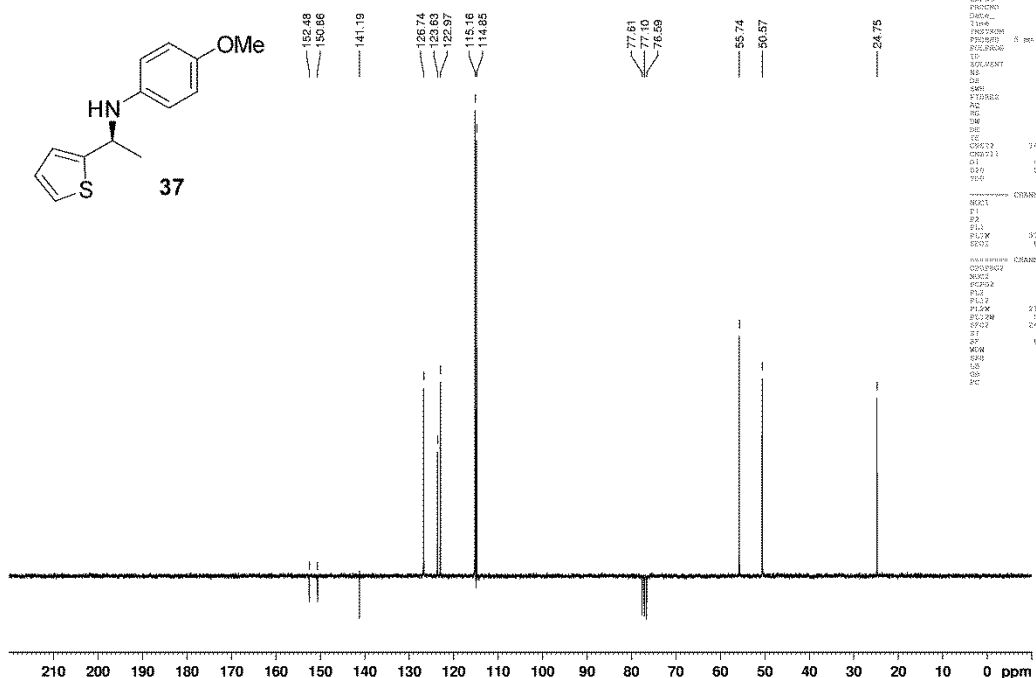

|                             |                |
|-----------------------------|----------------|
| The University of Sheffield |                |
| NAME                        | 37             |
| EXPNO                       | 1              |
| PROCNO                      | 1              |
| DATE_                       | 20100304       |
| TIME                        | 20.29          |
| INSTRUM                     | QNP1H          |
| PROBHD                      | 5 mm QNP 1H/13 |
| NUC1                        | 13C            |
| NUC2                        | 1H             |
| Q1                          | 1.00000000     |
| Q2                          | 1.00000000     |
| Q3                          | 1.00000000     |
| Q4                          | 1.00000000     |
| Q5                          | 1.00000000     |
| Q6                          | 1.00000000     |
| Q7                          | 1.00000000     |
| Q8                          | 1.00000000     |
| Q9                          | 1.00000000     |
| Q10                         | 1.00000000     |
| Q11                         | 1.00000000     |
| Q12                         | 1.00000000     |
| Q13                         | 1.00000000     |
| Q14                         | 1.00000000     |
| Q15                         | 1.00000000     |
| Q16                         | 1.00000000     |
| Q17                         | 1.00000000     |
| Q18                         | 1.00000000     |
| Q19                         | 1.00000000     |
| Q20                         | 1.00000000     |
| Q21                         | 1.00000000     |
| Q22                         | 1.00000000     |
| Q23                         | 1.00000000     |
| Q24                         | 1.00000000     |
| Q25                         | 1.00000000     |
| Q26                         | 1.00000000     |
| Q27                         | 1.00000000     |
| Q28                         | 1.00000000     |
| Q29                         | 1.00000000     |
| Q30                         | 1.00000000     |
| Q31                         | 1.00000000     |
| Q32                         | 1.00000000     |
| Q33                         | 1.00000000     |
| Q34                         | 1.00000000     |
| Q35                         | 1.00000000     |
| Q36                         | 1.00000000     |
| Q37                         | 1.00000000     |
| Q38                         | 1.00000000     |
| Q39                         | 1.00000000     |
| Q40                         | 1.00000000     |
| Q41                         | 1.00000000     |
| Q42                         | 1.00000000     |
| Q43                         | 1.00000000     |
| Q44                         | 1.00000000     |
| Q45                         | 1.00000000     |
| Q46                         | 1.00000000     |
| Q47                         | 1.00000000     |
| Q48                         | 1.00000000     |
| Q49                         | 1.00000000     |
| Q50                         | 1.00000000     |
| Q51                         | 1.00000000     |
| Q52                         | 1.00000000     |
| Q53                         | 1.00000000     |
| Q54                         | 1.00000000     |
| Q55                         | 1.00000000     |
| Q56                         | 1.00000000     |
| Q57                         | 1.00000000     |
| Q58                         | 1.00000000     |
| Q59                         | 1.00000000     |
| Q60                         | 1.00000000     |
| Q61                         | 1.00000000     |
| Q62                         | 1.00000000     |
| Q63                         | 1.00000000     |
| Q64                         | 1.00000000     |
| Q65                         | 1.00000000     |
| Q66                         | 1.00000000     |
| Q67                         | 1.00000000     |
| Q68                         | 1.00000000     |
| Q69                         | 1.00000000     |
| Q70                         | 1.00000000     |
| Q71                         | 1.00000000     |
| Q72                         | 1.00000000     |
| Q73                         | 1.00000000     |
| Q74                         | 1.00000000     |
| Q75                         | 1.00000000     |
| Q76                         | 1.00000000     |
| Q77                         | 1.00000000     |
| Q78                         | 1.00000000     |
| Q79                         | 1.00000000     |
| Q80                         | 1.00000000     |
| Q81                         | 1.00000000     |
| Q82                         | 1.00000000     |
| Q83                         | 1.00000000     |
| Q84                         | 1.00000000     |
| Q85                         | 1.00000000     |
| Q86                         | 1.00000000     |
| Q87                         | 1.00000000     |
| Q88                         | 1.00000000     |
| Q89                         | 1.00000000     |
| Q90                         | 1.00000000     |
| Q91                         | 1.00000000     |
| Q92                         | 1.00000000     |
| Q93                         | 1.00000000     |
| Q94                         | 1.00000000     |
| Q95                         | 1.00000000     |
| Q96                         | 1.00000000     |
| Q97                         | 1.00000000     |
| Q98                         | 1.00000000     |
| Q99                         | 1.00000000     |
| Q100                        | 1.00000000     |

XL3-43 250MHz  
PRO CDCl3 {C:01ja2010} ch3sj 21

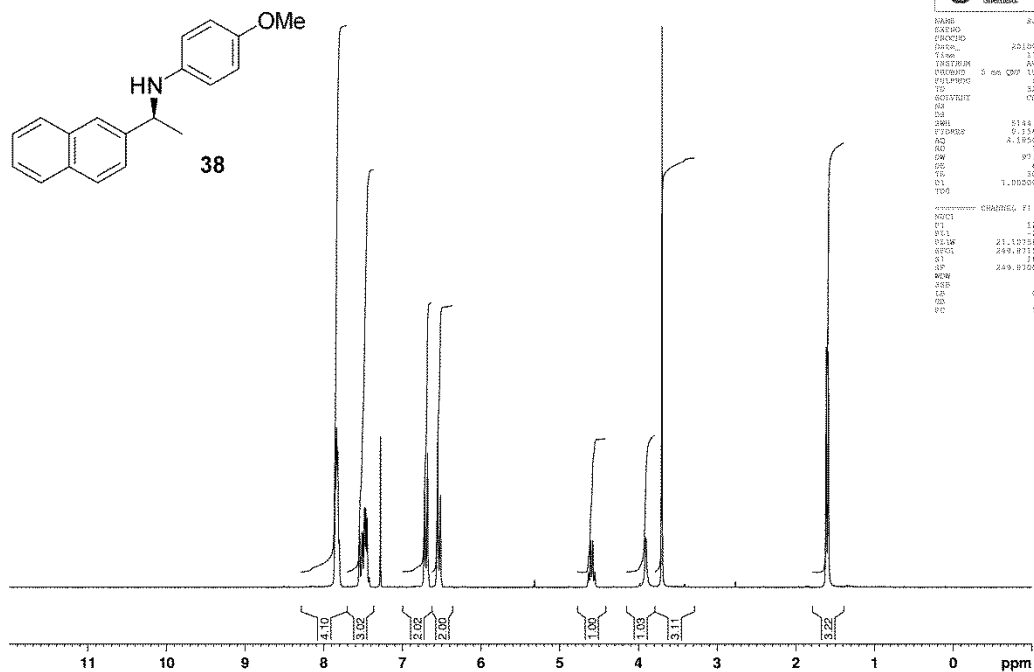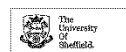

NAME: AL 89  
EXPNO: 2  
PROCNO: 1  
DATE\_: 20100122  
TIME: 17.37  
INSTRUM: spect  
PROBHD: 5 mm QNP 1H/13  
PULPROG: zgpg30  
TD: 65536  
SOLVENT: CDCl3  
NS: 64  
DS: 4  
SWH: 5144.033 Hz  
F2: 101.625 MHz  
AQ: 1.1950396 sec  
RG: 1024  
RM: 0.17230000 sec  
DS: 6.5000000 sec  
TE: 300.2 K  
D1: 1.00000000 sec  
TD0: 1

===== CHANNEL f1 =====  
NUC1: 13C  
P1: 12.00 usec  
PL1: -2.00 dB  
PL2: 21.10184931 dB  
PL3: 249.8711430 MHz  
PL4: 10.00 dB  
PL5: 249.8710000 MHz  
PL6: 0 dB  
PL7: 0.10 MHz  
PL8: 0 dB  
PL9: 1.00

XL3-43 250MHz  
JMOD250PPM CDCl3 {C:01ja2010} ch3sj 24

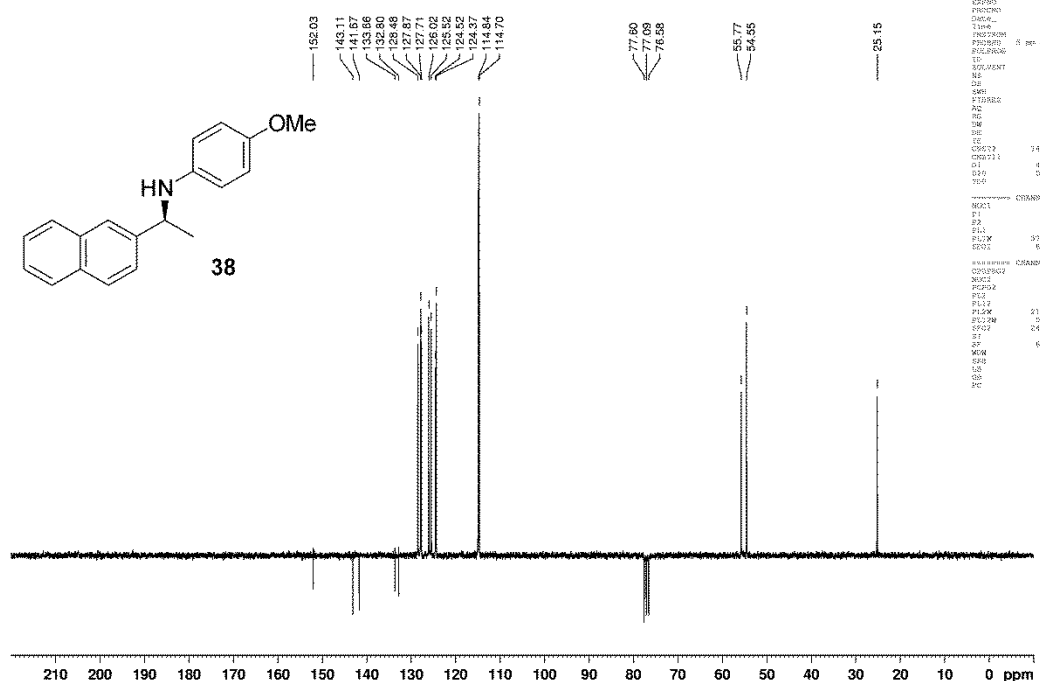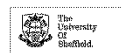

NAME: AL 89  
EXPNO: 2  
PROCNO: 1  
DATE\_: 20100122  
TIME: 20.41  
INSTRUM: spect  
PROBHD: 5 mm QNP 1H/13  
PULPROG: zgpg30  
TD: 65536  
SOLVENT: CDCl3  
NS: 64  
DS: 4  
SWH: 15723.271 MHz  
F2: 101.625 MHz  
AQ: 1.0440768 sec  
RG: 1024  
RM: 0.17230000 sec  
DS: 6.5000000 sec  
TE: 300.2 K  
D1: 1.00000000 sec  
D2: 4.00000000 sec  
D3: 0.00649693 sec  
TD0: 1

===== CHANNEL f1 =====  
NUC1: 13C  
P1: 12.00 usec  
PL1: -2.00 dB  
PL2: 19.99 dB  
PL3: 21.10184931 dB  
PL4: 10.00 dB  
PL5: 249.8710000 MHz  
PL6: 0 dB  
PL7: 0.10 MHz  
PL8: 0 dB  
PL9: 1.00

Created : 10/01/2010 16:00:12  
Project : Work3  
Sample ID : XL3-32  
Calibration : XL3-32 racemic

By : Clarity  
Report Style : Instrument  
Sample : XL3-32  
Chromatogram : DATA\XL3-32 racemic

Method : Cellulose-1  
Description : Cellulose-1  
Created : 24/08/2004 16:25

By : Clarity  
Modified : 10/01/2010 16:00

Column : Phenomenex Lux 3um Cellulose-1  
Mobile Phase : 2% ipa in hexane  
Flow Rate : 1mL/min  
Note :

Detection : UV@254nm  
Temperature : RT  
Pressure :

Autostop : 30.00, min  
Detector 1 : Signal 1  
Subtraction chromatogram : (None)

External Start : Start Only, Down  
Range 1 : Bipolar, 10000 mV, 10 Samp. per Sec.  
Matching : No Change

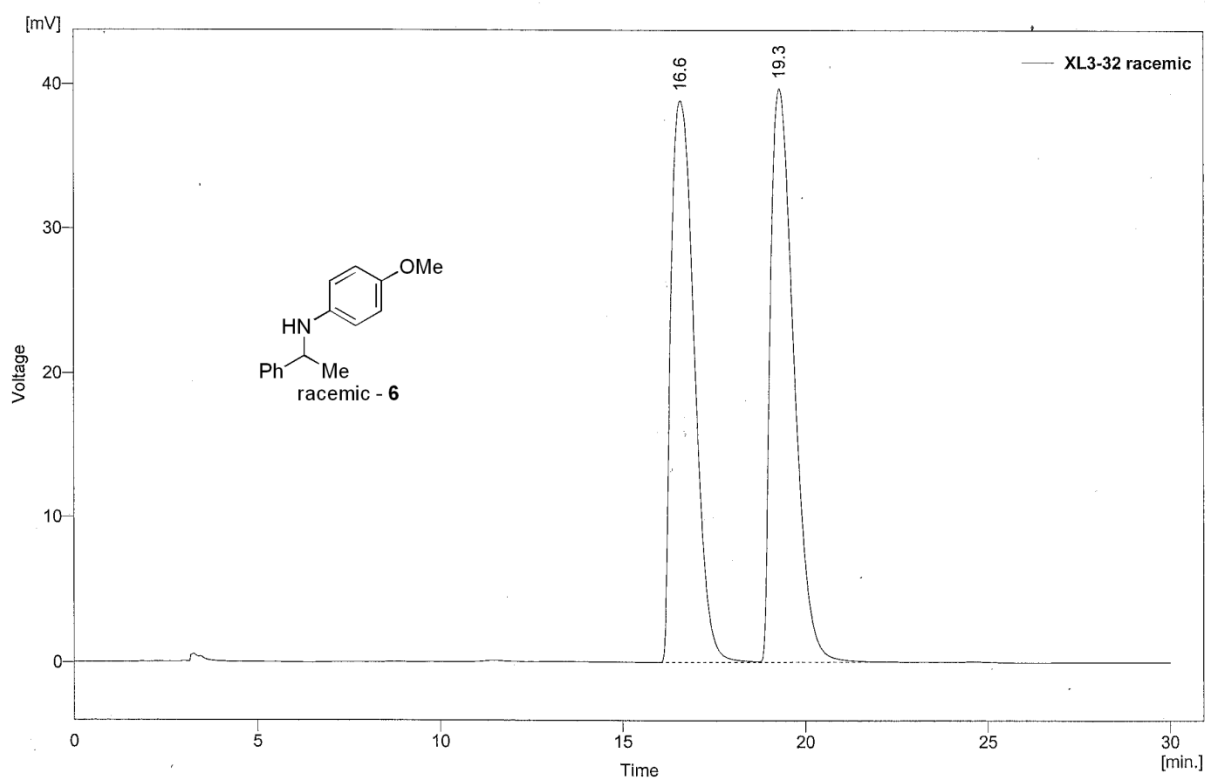

Result Table - Calculation Method Uncal

|   | Reten. Time<br>[min] | Area<br>[mV.s] | Height<br>[mV] | Area<br>[%] | Height<br>[%] | W05<br>[min] |
|---|----------------------|----------------|----------------|-------------|---------------|--------------|
| 1 | 16.590               | 17196.929      | 388.580        | 49.7        | 49.5          | 0.72         |
| 2 | 19.300               | 17434.270      | 396.850        | 50.3        | 50.5          | 0.70         |
|   | Total                | 34631.199      | 785.431        | 100.0       | 100.0         |              |

Created : 10/01/2010 12:34:15  
Project : Work3  
Sample ID : XL3-32  
Calibration : XL3-32

By : Clarity  
Report Style : Instrument  
Sample : XL3-32  
Chromatogram : DATA\XL3-32

Method : Cellulose-1  
Description : Cellulose-1  
Created : 24/08/2004 16:25

By : Clarity  
Modified : 10/01/2010 15:21

Column : Phenomenex Lux 3um Cellulose-1  
Mobile Phase : 2% ipa in hexane  
Flow Rate : 1mL/min  
Note :

Detection : UV@254nm  
Temperature : RT  
Pressure :

Autostop : 30.00, min  
Detector 1 : Signal 1  
Subtraction chromatogram : (None)

External Start : Start Only, Down  
Range 1 : Bipolar, 10000 mV, 10 Samp. per Sec.  
Matching : No Change

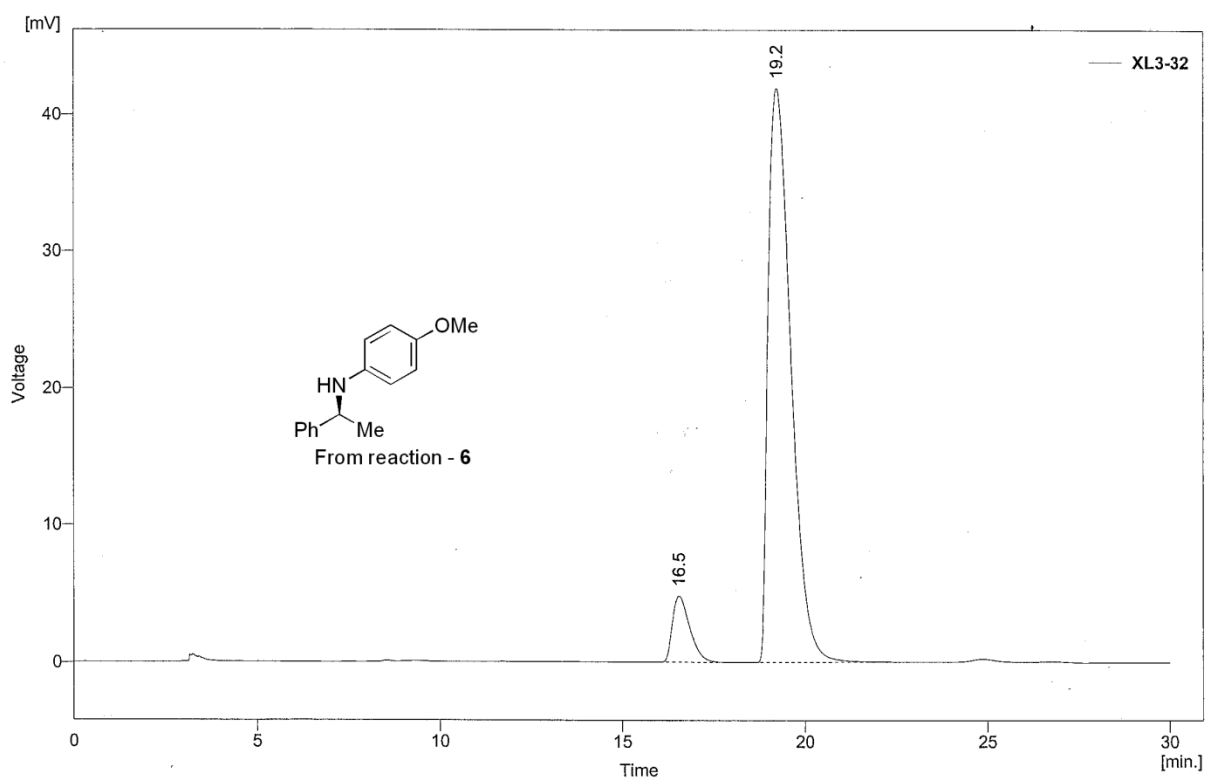

Result Table - Calculation Method Uncal

|   | Reten. Time<br>[min] | Area<br>[mV.s] | Height<br>[mV] | Area<br>[%] | Height<br>[%] | W05<br>[min] |
|---|----------------------|----------------|----------------|-------------|---------------|--------------|
| 1 | 16.547               | 1589.334       | 48.278         | 8.1         | 10.3          | 0.51         |
| 2 | 19.233               | 17979.914      | 419.226        | 91.9        | 89.7          | 0.68         |
|   | Total                | 19569.247      | 467.504        | 100.0       | 100.0         |              |

Created : 04/04/2009 19:02:19  
Project : Work3  
Sample ID : XL078  
Calibration : XL079'

By : Clarity  
Report Style : Instrument  
Sample : XL078  
Chromatogram : DATA\XL079'

Method : Cellucoat  
Description : Kromasil OD  
Created : 24/08/2004 16:25

By : Clarity  
Modified : 04/04/2009 19:02

Column : Kromasil 3-Cellucoat OD  
Mobile Phase : 1% ipa in hexane  
Flow Rate : 1mL/min  
Note :

Detection : UV@254nm  
Temperature : RT  
Pressure :

Autostop : 13.00, min  
Detector 1 : Signal 1  
Subtraction chromatogram : (None)

External Start : Start Only, Down  
Range 1 : Bipolar, 10000 mV, 10 Samp. per Sec.  
Matching : No Change

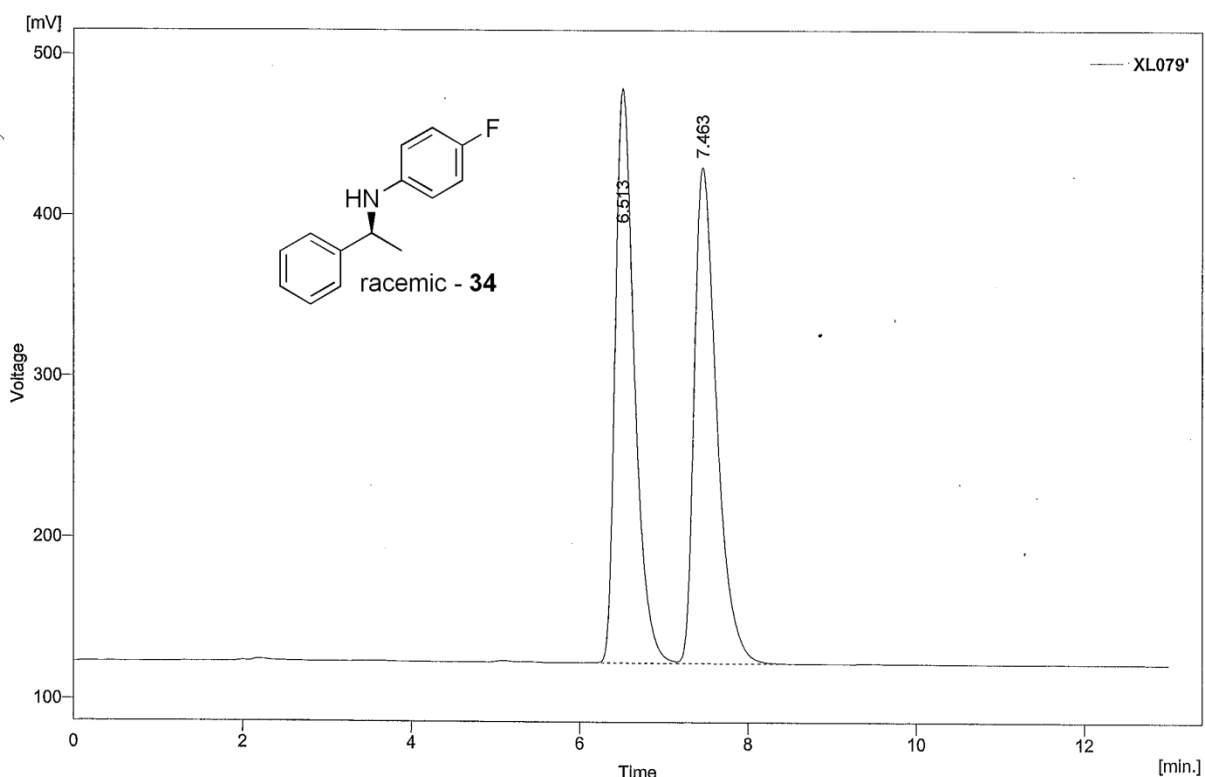

Result Table - Calculation Method Uncal

|       | Reten. Time<br>[min] | Area<br>[mV.s] | Height<br>[mV] | Area<br>[%] | Height<br>[%] | W05<br>[min] |
|-------|----------------------|----------------|----------------|-------------|---------------|--------------|
| 1     | 6.513                | 5684.755       | 356.335        | 49.9        | 53.7          | 0.24         |
| 2     | 7.463                | 5696.551       | 307.619        | 50.1        | 46.3          | 0.28         |
| Total |                      | 11381.306      | 663.954        | 100.0       | 100.0         |              |



Created : 04/04/2009 19:48:47  
Project : Work3  
Sample ID : XL078  
Calibration : XL078-2

By : Clarity  
Report Style : Instrument  
Sample : XL078  
Chromatogram : DATA\XL078-2

Method : Cellucoat  
Description : Kromasil OD  
Created : 24/08/2004 16:25

By : Clarity  
Modified : 04/04/2009 19:48

Column : Kromasil 3-Cellucoat OD  
Mobile Phase : 1% ipa in hexane  
Flow Rate : 1mL/min  
Note :

Detection : UV@254nm  
Temperature : RT  
Pressure :

Autostop : 13.00, min  
Detector 1 : Signal 1  
Subtraction chromatogram : (None)

External Start : Start Only, Down  
Range 1 : Bipolar, 10000 mV, 10 Samp. per Sec.  
Matching : No Change

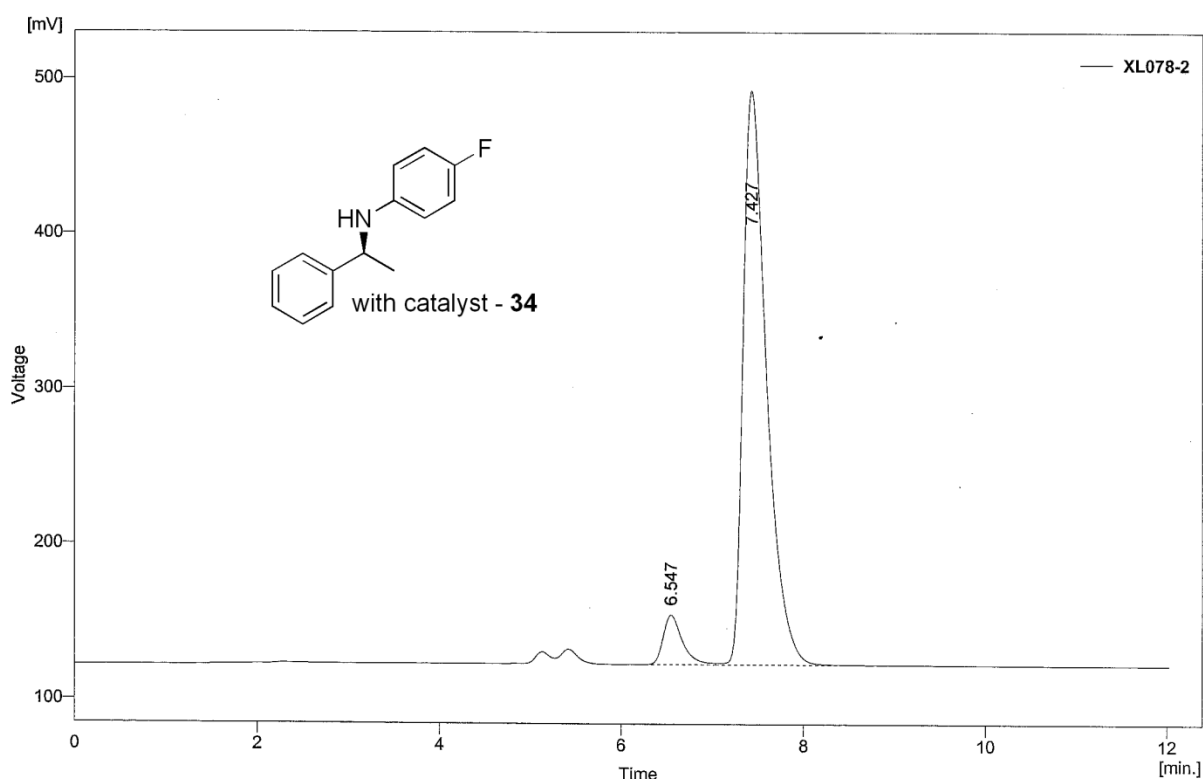

Result Table - Calculation Method Uncal

|       | Reten. Time<br>[min] | Area<br>[mV.s] | Height<br>[mV] | Area<br>[%] | Height<br>[%] | W05<br>[min] |
|-------|----------------------|----------------|----------------|-------------|---------------|--------------|
| 1     | 6.547                | 468.409        | 31.917         | 6.6         | 7.9           | 0.22         |
| 2     | 7.427                | 6612.641       | 369.652        | 93.4        | 92.1          | 0.27         |
| Total |                      | 7081.050       | 401.569        | 100.0       | 100.0         |              |

86.9%

Created : 18/01/2010 12:49:13  
Project : Work3  
Sample ID : XL3-37  
Calibration : XL3-37

By : Clarity  
Report Style : Instrument  
Sample : XL3-37  
Chromatogram : DATA\XL3-37

Method : Cellulose-1  
Description : Cellulose-1  
Created : 24/08/2004 16:25

By : Clarity  
Modified : 18/01/2010 15:26

Column : Phenomenex Lux 3um Cellulose-1  
Mobile Phase : 10% ipa in hexane  
Flow Rate : 1mL/min  
Note :

Detection : UV@254nm  
Temperature : RT  
Pressure :

Autostop : 20.00, min  
Detector 1 : Signal 1  
Subtraction chromatogram : (None)

External Start : Start Only, Down  
Range 1 : Bipolar, 10000 mV, 10 Samp. per Sec.  
Matching : No Change

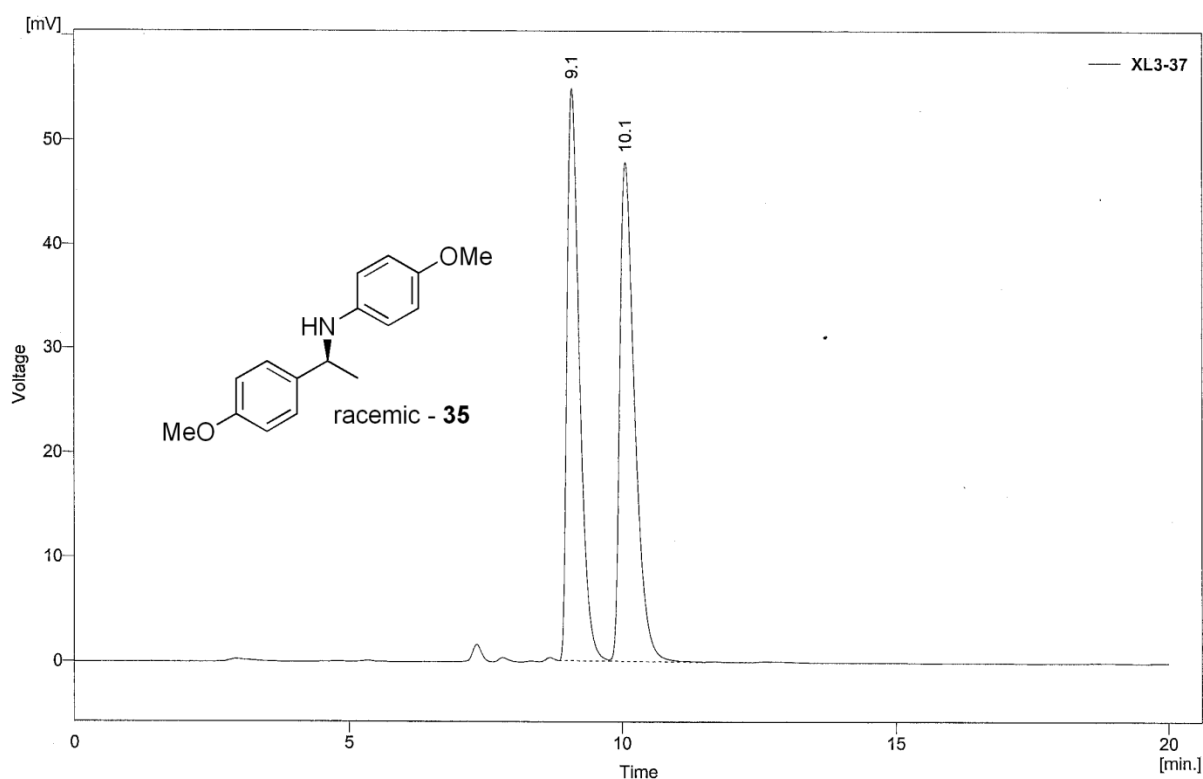

Result Table - Calculation Method Uncal

|       | Reten. Time<br>[min] | Area<br>[mV.s] | Height<br>[mV] | Area<br>[%] | Height<br>[%] | W05<br>[min] |
|-------|----------------------|----------------|----------------|-------------|---------------|--------------|
| 1     | 9.077                | 8811.267       | 548.372        | 49.1        | 53.4          | 0.25         |
| 2     | 10.063               | 9137.374       | 478.874        | 50.9        | 46.6          | 0.29         |
| Total |                      | 17948.641      | 1027.246       | 100.0       | 100.0         |              |

Created : 18/01/2010 15:50:54  
Project : Work3  
Sample ID : XL3-39  
Calibration : XL3-39

By : Clarity  
Report Style : Instrument  
Sample : XL3-39  
Chromatogram : DATA\XL3-39

Method : Cellulose-1  
Description : Cellulose-1  
Created : 24/08/2004 16:25

By : Clarity  
Modified : 18/01/2010 15:50

Column : Phenomenex Lux 3um Cellulose-1  
Mobile Phase : 10% ipa in hexane  
Flow Rate : 1mL/min  
Note :

Detection : UV@254nm  
Temperature : RT  
Pressure :

Autostop : 20.00, min  
Detector 1 : Signal 1  
Subtraction chromatogram : (None)

External Start : Start Only, Down  
Range 1 : Bipolar, 10000 mV, 10 Samp. per Sec.  
Matching : No Change

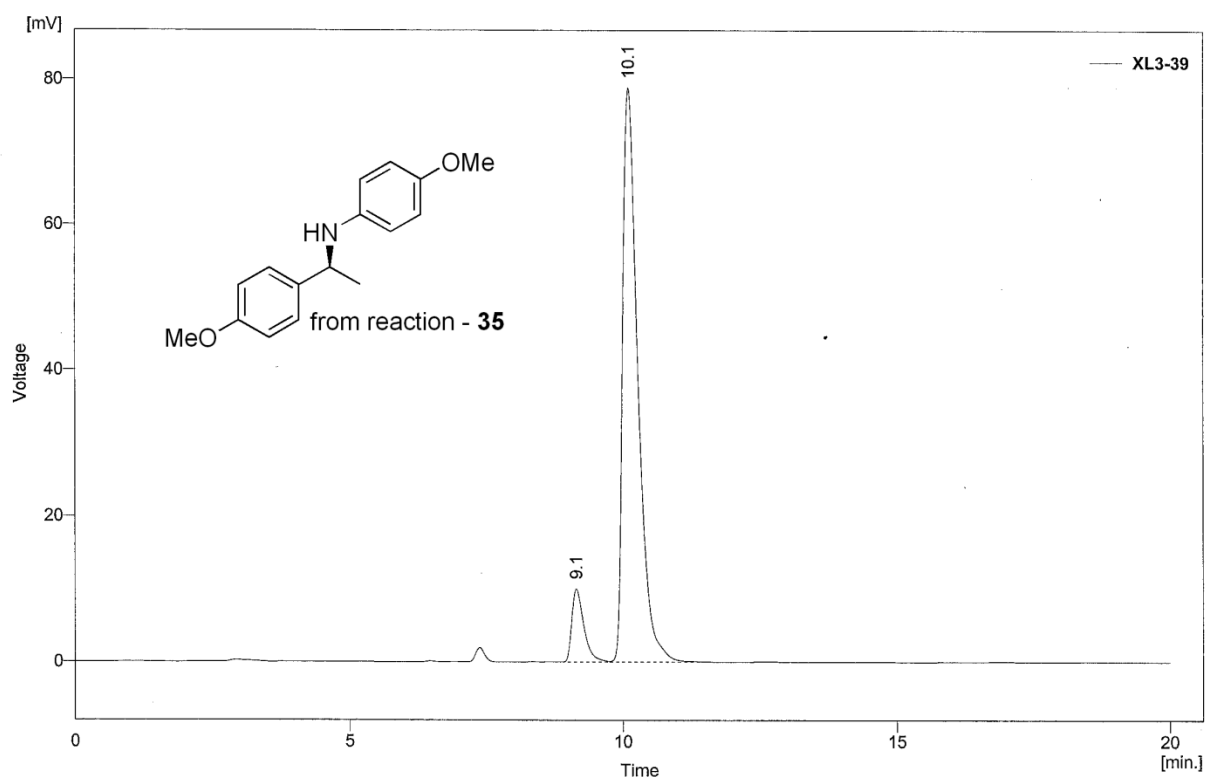

Result Table - Calculation Method Uncal

|       | Reten. Time<br>[min] | Area<br>[mV.s] | Height<br>[mV] | Area<br>[%] | Height<br>[%] | W05<br>[min] |
|-------|----------------------|----------------|----------------|-------------|---------------|--------------|
| 1     | 9.140                | 1559.629       | 100.719        | 9.3         | 11.3          | 0.23         |
| 2     | 10.103               | 15275.953      | 788.398        | 90.7        | 88.7          | 0.29         |
| Total |                      | 16835.583      | 889.117        | 100.0       | 100.0         |              |

Created : 15/01/2010 11:10:21  
Project : Work3  
Sample ID : XL3-35  
Calibration : XL3-35

By : Clarity  
Report Style : Instrument  
Sample : XL3-35  
Chromatogram : DATA\XL3-35

Method : Cellulose-1  
Description : Cellulose-1  
Created : 24/08/2004 16:25

By : Clarity  
Modified : 15/01/2010 11:10

Column : Phenomenex Lux 3um Cellulose-1  
Mobile Phase : 10% ipa in hexane  
Flow Rate : 1mL/min  
Note :

Detection : UV@254nm  
Temperature : RT  
Pressure :

Autostop : 80.00, min  
Detector 1 : Signal 1  
Subtraction chromatogram : (None)

External Start : Start Only, Down  
Range 1 : Bipolar, 10000 mV, 10 Samp. per Sec.  
Matching : No Change

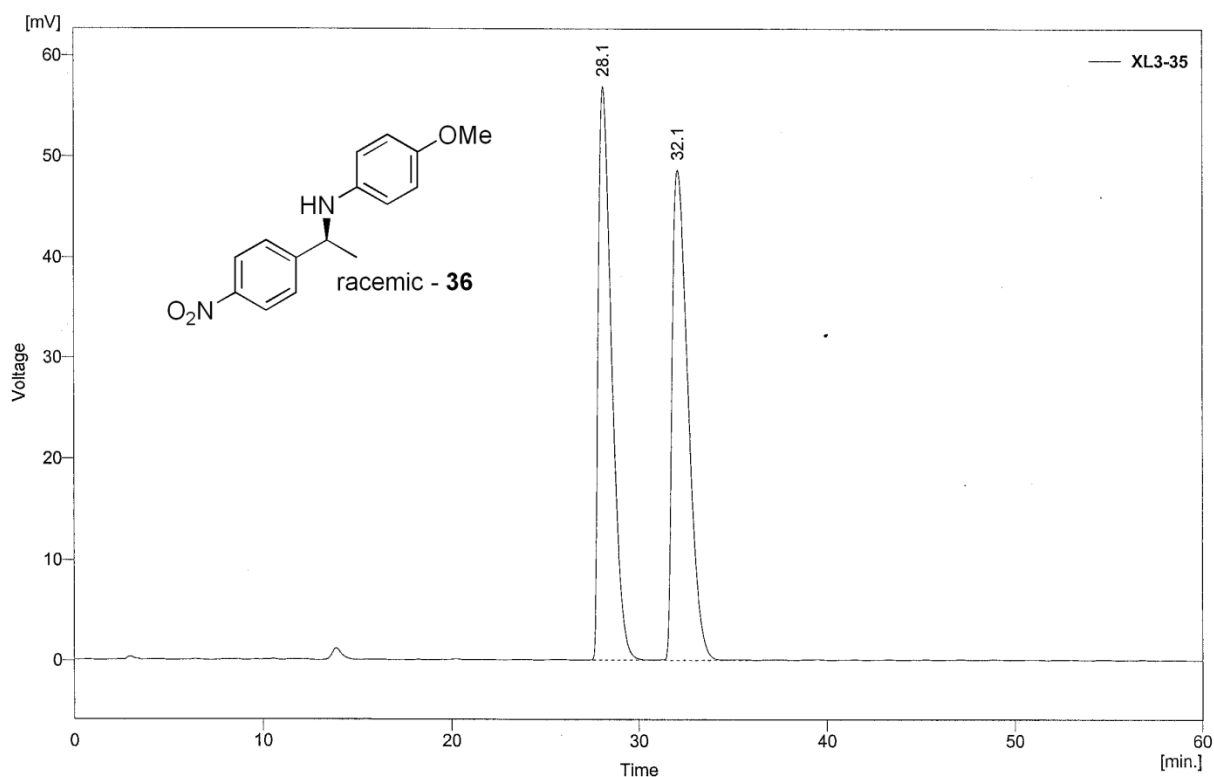

Result Table - Calculation Method Uncal

|       | Reten. Time<br>[min] | Area<br>[mV.s] | Height<br>[mV] | Area<br>[%] | Height<br>[%] | W05<br>[min] |
|-------|----------------------|----------------|----------------|-------------|---------------|--------------|
| 1     | 28.110               | 28290.391      | 568.854        | 50.0        | 53.9          | 0.78         |
| 2     | 32.103               | 28339.401      | 486.131        | 50.0        | 46.1          | 0.92         |
| Total |                      | 56629.793      | 1054.985       | 100.0       | 100.0         |              |

Created : 15/01/2010 14:09:53  
Project : Work3  
Sample ID : XL3-34  
Calibration : XL3-34

By : Clarity  
Report Style : Instrument  
Sample : XL3-34  
Chromatogram : DATA\XL3-34

Method : Cellulose-1  
Description : Cellulose-1  
Created : 24/08/2004 16:25

By : Clarity  
Modified : 15/01/2010 14:11

Column : Phenomenex Lux 3um Cellulose-1  
Mobile Phase : 10% ipa in hexane  
Flow Rate : 1mL/min  
Note :

Detection : UV@254nm  
Temperature : RT  
Pressure :

Autostop : 60.00, min  
Detector 1 : Signal 1  
Subtraction chromatogram : (None)

External Start : Start Only, Down  
Range 1 : Bipolar, 10000 mV, 10 Samp. per Sec.  
Matching : No Change

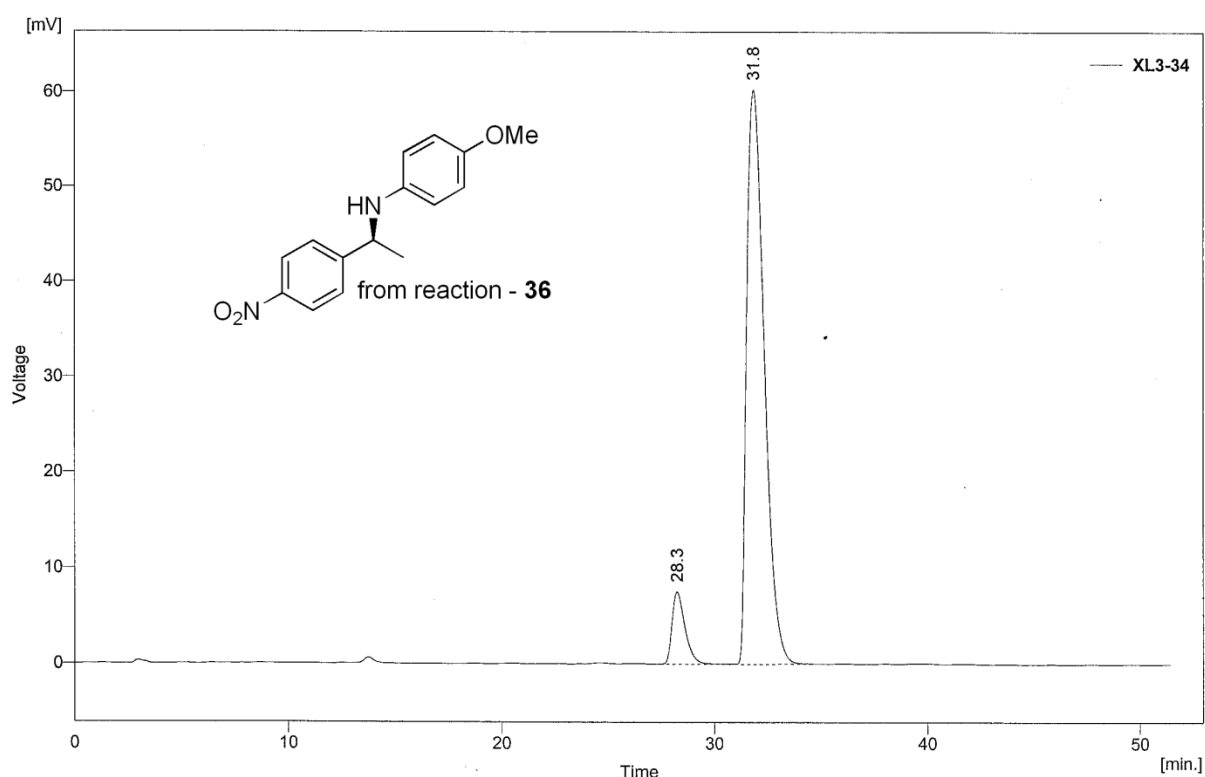

Result Table - Calculation Method Uncal

|       | Reten. Time<br>[min] | Area<br>[mV.s] | Height<br>[mV] | Area<br>[%] | Height<br>[%] | W05<br>[min] |
|-------|----------------------|----------------|----------------|-------------|---------------|--------------|
| 1     | 28.250               | 3245.013       | 75.631         | 8.6         | 11.1          | 0.65         |
| 2     | 31.830               | 34463.271      | 602.775        | 91.4        | 88.9          | 0.91         |
| Total |                      | 37708.284      | 678.406        | 100.0       | 100.0         |              |

Created : 04/03/2010 10:06:40  
Project : Work3  
Sample ID : XL3-66  
Calibration : XL3-66 racemic

By : Clarity  
Report Style : Instrument  
Sample : XL3-66  
Chromatogram : DATA\XL3-66 racemic

Method : Cellulose-1  
Description : Cellulose-1  
Created : 24/08/2004 16:25

By : Clarity  
Modified : 04/03/2010 10:08

Column : Phenomenex Lux 3um Cellulose-1  
Mobile Phase : 2% ipa in hexane  
Flow Rate : 1mL/min  
Note :

Detection : UV@254nm  
Temperature : RT  
Pressure :

Autostop : 60.00, min  
Detector 1 : Signal 1  
Subtraction chromatogram : (None)

External Start : Start Only, Down  
Range 1 : Bipolar, 10000 mV, 10 Samp. per Sec.  
Matching : No Change

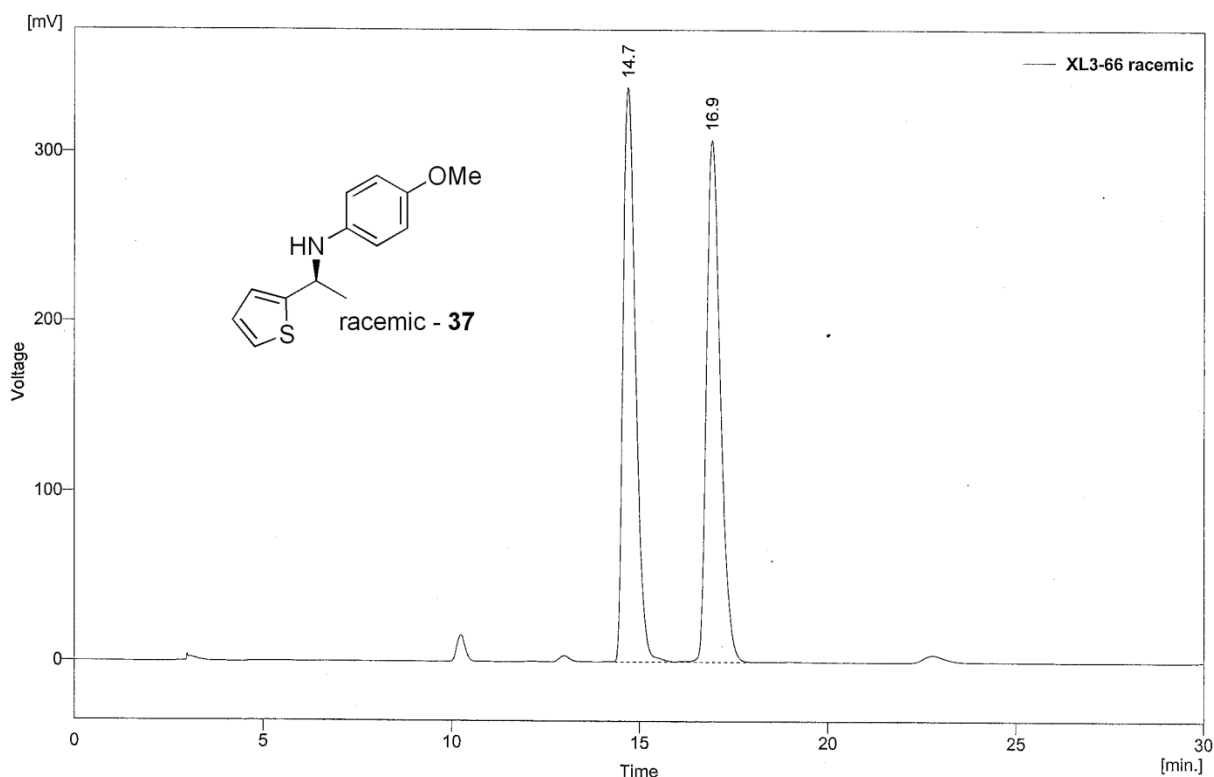

Result Table - Calculation Method Uncal

|       | Reten. Time<br>[min] | Area<br>[mV.s] | Height<br>[mV] | Area<br>[%] | Height<br>[%] | W05<br>[min] |
|-------|----------------------|----------------|----------------|-------------|---------------|--------------|
| 1     | 14.690               | 7854.266       | 338.065        | 49.8        | 52.4          | 0.37         |
| 2     | 16.920               | 7902.793       | 307.130        | 50.2        | 47.6          | 0.40         |
| Total |                      | 15757.059      | 645.195        | 100.0       | 100.0         |              |

Created : 04/03/2010 19:40:58  
Project : Work3  
Sample ID : XL66 chiral  
Calibration : XL66 chiral'

By : Clarity  
Report Style : Instrument  
Sample : XL66 chiral  
Chromatogram : DATA\XL66 chiral'

Method : Cellulose-1  
Description : Cellulose-1  
Created : 24/08/2004 16:25

By : Clarity  
Modified : 04/03/2010 19:40

Column : Phenomenex Lux 3um Cellulose-1  
Mobile Phase : 2% ipa in hexane  
Flow Rate : 1mL/min  
Note :

Detection : UV@254nm  
Temperature : RT  
Pressure :

Autostop : 30.00, min  
Detector 1 : Signal 1  
Subtraction chromatogram : (None)

External Start : Start Only, Down  
Range 1 : Bipolar, 10000 mV, 10 Samp. per Sec.  
Matching : No Change

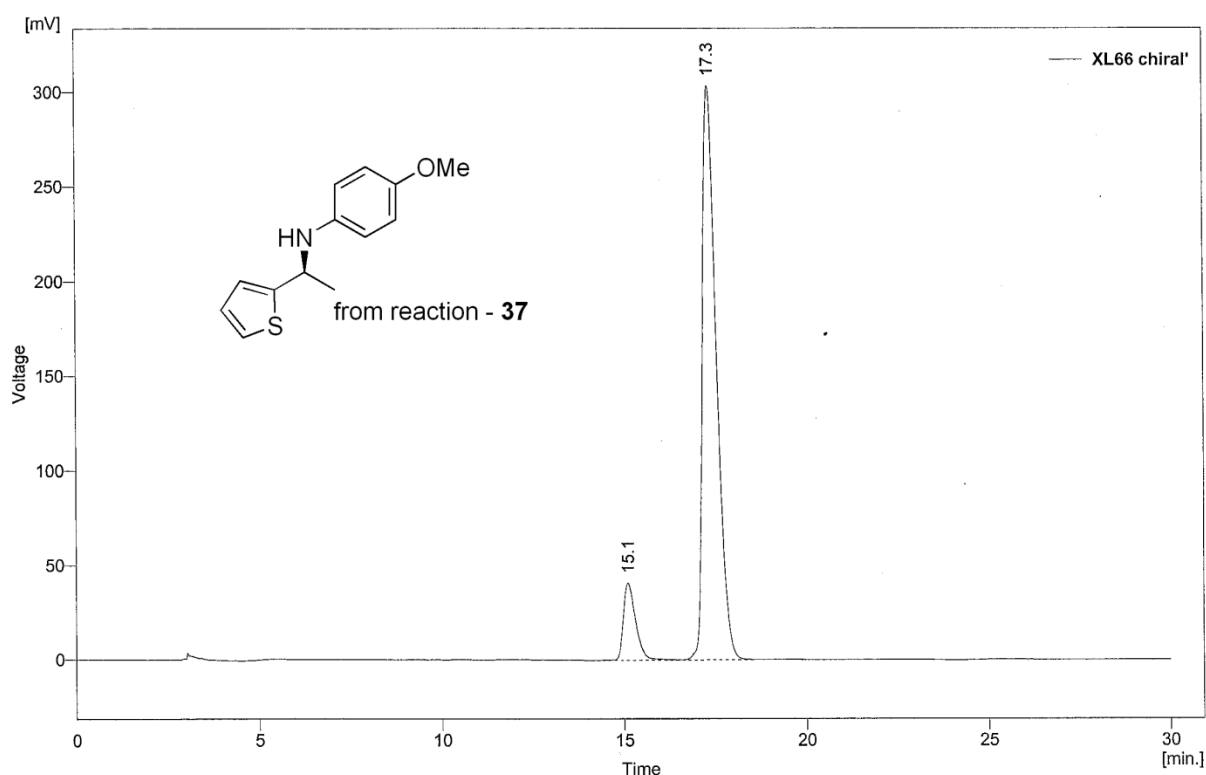

Result Table - Calculation Method Uncal

|       | Reten. Time<br>[min] | Area<br>[mV.s] | Height<br>[mV] | Area<br>[%] | Height<br>[%] | W05<br>[min] |
|-------|----------------------|----------------|----------------|-------------|---------------|--------------|
| 1     | 15.113               | 959.038        | 40.887         | 10.7        | 11.9          | 0.35         |
| 2     | 17.337               | 8031.051       | 303.354        | 89.3        | 88.1          | 0.41         |
| Total |                      | 8990.090       | 344.241        | 100.0       | 100.0         |              |

Created : 22/01/2010 11:26:21  
Project : Work3  
Sample ID : XL3-43 racemic  
Calibration : XL3-43 racemic

By : Clarity  
Report Style : Instrument  
Sample : XL3-43 racemic  
Chromatogram : DATA\XL3-43 racemic

Method : Cellulose-1  
Description : Cellulose-1  
Created : 24/08/2004 16:25

By : Clarity  
Modified : 22/01/2010 11:26

Column : Phenomenex Lux 3um Cellulose-1  
Mobile Phase : 10% ipa in hexane  
Flow Rate : 1mL/min  
Note :

Detection : UV@254nm  
Temperature : RT  
Pressure :

Autostop : 20.00, min  
Detector 1 : Signal 1  
Subtraction chromatogram : (None)

External Start : Start Only, Down  
Range 1 : Bipolar, 10000 mV, 10 Samp. per Sec.  
Matching : No Change

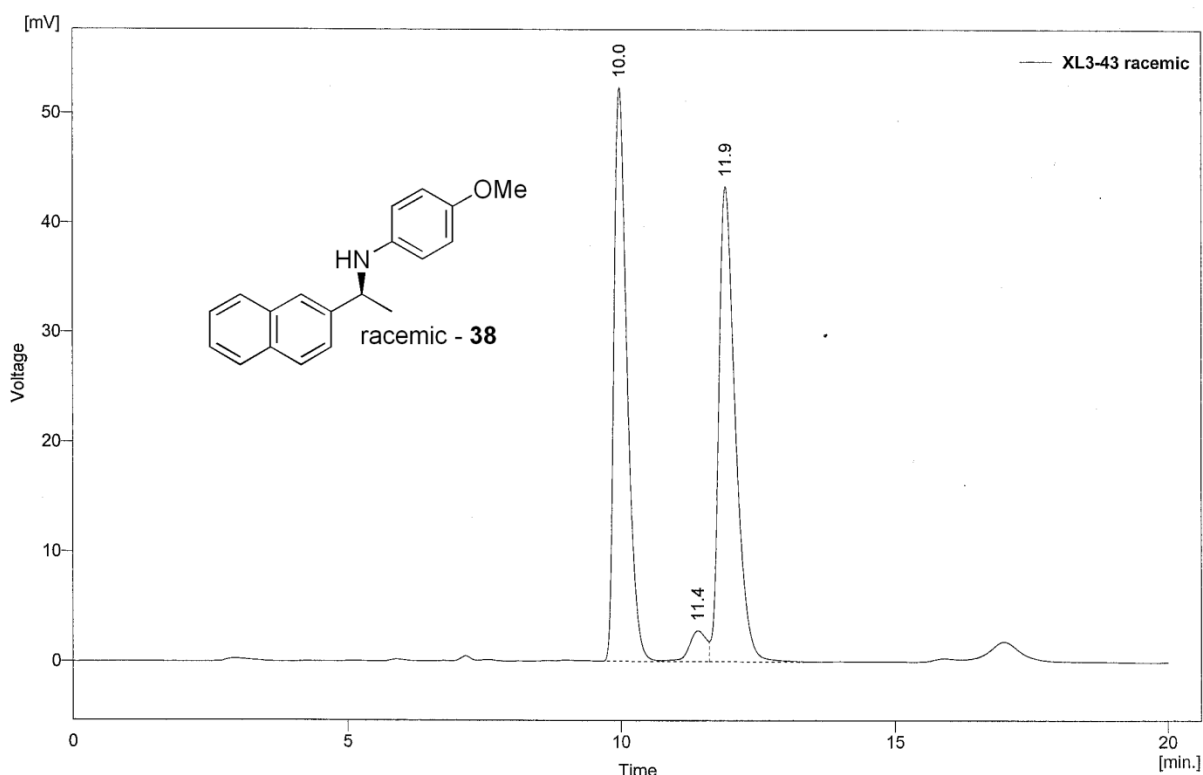

Result Table - Calculation Method Uncal

|       | Reten. Time<br>[min] | Area<br>[mV.s] | Height<br>[mV] | Area<br>[%] | Height<br>[%] | W05<br>[min] |
|-------|----------------------|----------------|----------------|-------------|---------------|--------------|
| 1     | 9.977                | 8825.033       | 523.673        | 47.7        | 53.1          | 0.26         |
| 2     | 11.400               | 607.810        | 28.245         | 3.3         | 2.9           | 0.37         |
| 3     | 11.913               | 9052.532       | 433.507        | 49.0        | 44.0          | 0.32         |
| Total |                      | 18485.375      | 985.425        | 100.0       | 100.0         |              |



Created : 22/01/2010 12:04:25  
Project : Work3  
Sample ID : XL3-43  
Calibration : XL3-43

By : Clarity  
Report Style : Instrument  
Sample : XL3-43  
Chromatogram : DATA\XL3-43

Method : Cellulose-1  
Description : Cellulose-1  
Created : 24/08/2004 16:25

By : Clarity  
Modified : 22/01/2010 12:04

Column : Phenomenex Lux 3um Cellulose-1  
Mobile Phase : 10% ipa in hexane  
Flow Rate : 1mL/min  
Note :

Detection : UV@254nm  
Temperature : RT  
Pressure :

Autostop : 20.00, min  
Detector 1 : Signal 1  
Subtraction chromatogram : (None)

External Start : Start Only, Down  
Range 1 : Bipolar, 10000 mV, 10 Samp. per Sec.  
Matching : No Change

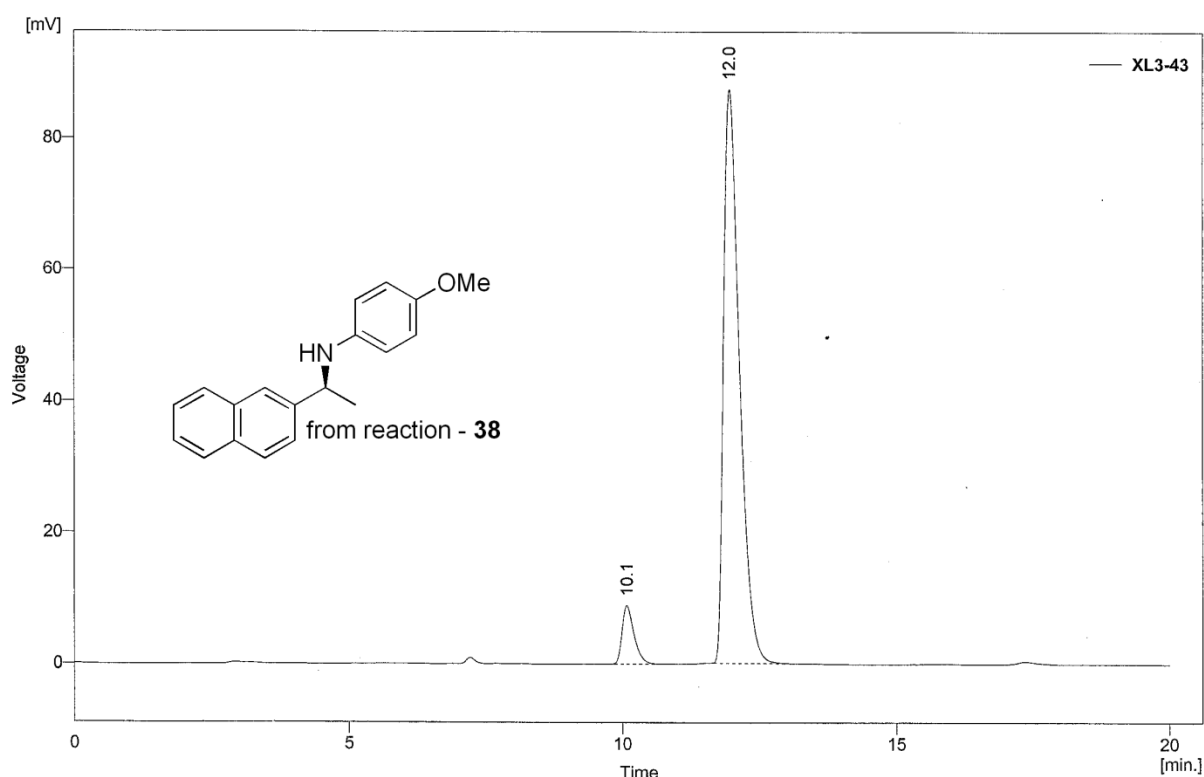

Result Table - Calculation Method Uncal

|       | Reten. Time<br>[min] | Area<br>[mV.s] | Height<br>[mV] | Area<br>[%] | Height<br>[%] | W05<br>[min] |
|-------|----------------------|----------------|----------------|-------------|---------------|--------------|
| 1     | 10.080               | 1370.414       | 88.888         | 7.3         | 9.2           | 0.24         |
| 2     | 11.963               | 17476.951      | 873.441        | 92.7        | 90.8          | 0.31         |
| Total |                      | 18847.365      | 962.329        | 100.0       | 100.0         |              |

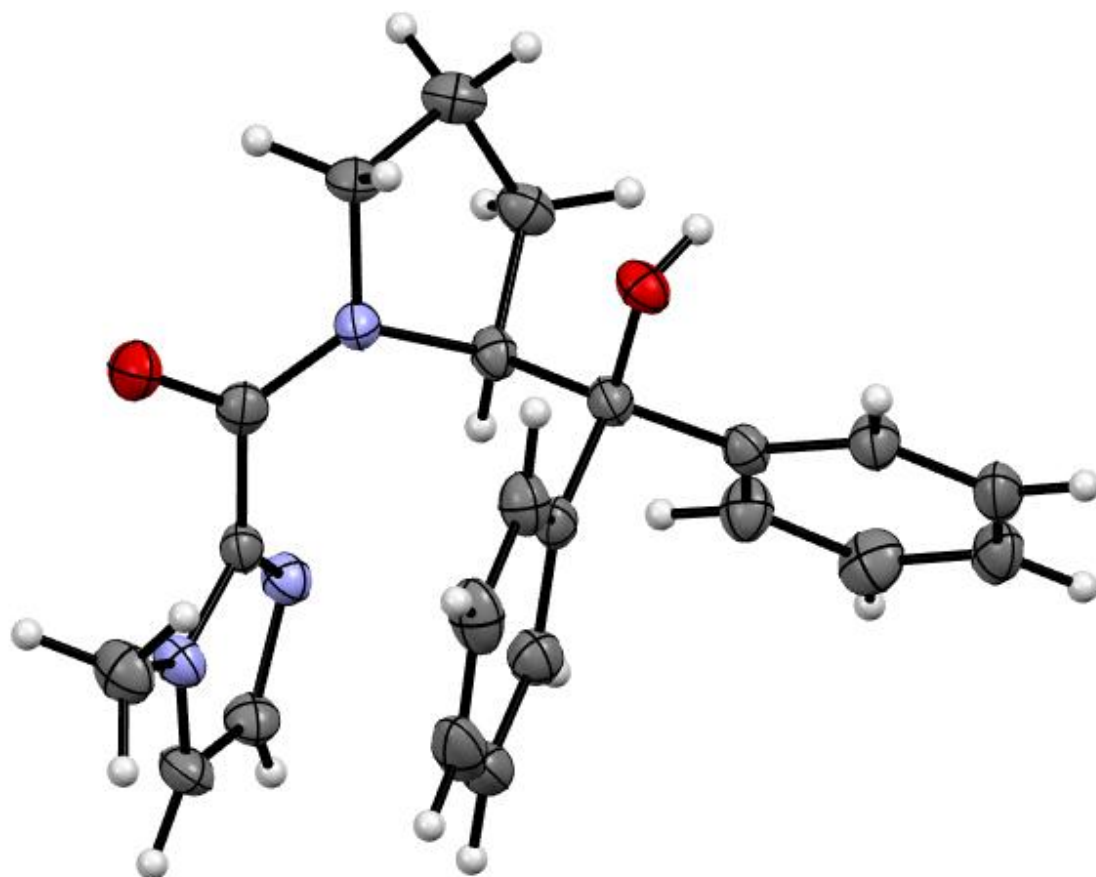

X-ray crystallographic representation of catalyst **17**. Thermal ellipsoids are shown at 50% probability. Submitted to the CCDC as 1517809
